# Supplementary material for: Breast Cancer Risk Assessment Tools for Stratifying Women into Risk Groups: A Systematic Review
Source: MDPI journal article supplement (doi:10.3390/cancers15041124), 2023-02-09
Supplement: s1 [file s1]

**Table S3: Detailed assessment of risk of bias of included prognostic risk assessment tool for breast cancer calibration outcomes**

| Study               | RAT              | Cohort     | Year | Outcome          | Participants |     |     | Predictors |     |     |     | Outcome |     |     |     |     |     |     |     | Analysis <sup>a</sup> |     |     |     |     |     |     |     | Overall I |
|---------------------|------------------|------------|------|------------------|--------------|-----|-----|------------|-----|-----|-----|---------|-----|-----|-----|-----|-----|-----|-----|-----------------------|-----|-----|-----|-----|-----|-----|-----|-----------|
|                     |                  |            |      |                  | 1.1          | 1.2 | RoB | 2.1        | 2.2 | 2.3 | RoB | 3.1     | 3.2 | 3.3 | 3.4 | 3.5 | 3.6 | 3.7 | 3.8 | 4.1                   | 4.2 | 4.3 | 4.4 | 4.5 | 4.6 | 4.7 | 4.8 | RoB       |
| Hurson 2021 [29]    | iCARE BPC3       | UK Biobank | 5    | Invasive or DCIS | L            | L   | L   | L          | L   | L   | L   | L       | L   | L   | L   | U   | U   | U   |     | H                     | U   | L   | H   | L   | L   | H   |     | H         |
| Hurson 2021         | iCARE BPC3 L PRS | UK Biobank | 5    | Invasive or DCIS | L            | L   | L   | L          | U   | L   | U   | L       | L   | L   | L   | U   | U   | U   |     | H                     | U   | L   | H   | L   | L   | H   |     | H         |
| Hurson 2021         | iCARE Lit        | UK Biobank | 5    | Invasive or DCIS | L            | L   | L   | L          | L   | L   | L   | L       | L   | L   | L   | U   | U   | U   |     | H                     | U   | L   | H   | L   | L   | H   |     | H         |
| Hurson 2021         | iCARE Lit L PRS  | UK Biobank | 5    | Invasive or DCIS | L            | L   | L   | L          | U   | L   | U   | L       | L   | L   | L   | U   | U   | U   |     | H                     | U   | L   | H   | L   | L   | H   |     | H         |
| Hurson 2021         | iCARE Lit        | WGHS       | 5    | Invasive or DCIS | L            | L   | L   | U          | U   | L   | U   | L       | L   | L   | U   | U   | L   | U   |     | H                     | U   | L   | H   | L   | L   | H   |     | H         |
| Hurson 2021         | iCARE Lit L PRS  | WGHS       | 5    | Invasive or DCIS | L            | L   | L   | U          | U   | L   | U   | L       | L   | L   | U   | U   | L   | U   |     | H                     | U   | L   | H   | L   | L   | H   |     | H         |
| Jantzen 2021 [39]   | TC v8            | CARTaGE NE | 5    | Invasive         | L            | L   | L   | L          | L   | L   | L   | H       | L   | L   | U   | L   | L   | U   |     | H                     | L   | H   | H   | L   | L   | H   |     | H         |
| Jantzen 2021        | BCRAT v4         | CARTaGE NE | 5    | Invasive         | L            | L   | L   | L          | L   | L   | L   | H       | L   | L   | U   | L   | L   | U   |     | H                     | L   | H   | H   | L   | L   | H   |     | H         |
| McCarthy 2020 [38]  | TC v7            | NWH        | 6    | Invasive         | L            | H   | H   | L          | L   | L   | L   | L       | U   | L   | U   | U   | L   | U   |     | H                     | U   | L   | L   | L   | L   | H   |     | H         |
| McCarthy 2020       | TC v8.0b         | NWH        | 6    | Invasive         | L            | H   | H   | L          | L   | L   | L   | L       | U   | L   | U   | U   | L   | U   |     | H                     | U   | L   | L   | L   | L   | H   |     | H         |
| McCarthy 2020       | BCRAT v4         | NWH        | 6    | Invasive         | L            | L   | L   | L          | L   | L   | L   | L       | U   | L   | U   | U   | L   | U   |     | H                     | U   | L   | U   | L   | L   | H   |     | H         |
| McCarthy 2020       | BRCAPRO v2.1H4   | NWH        | 6    | Invasive         | L            | H   | H   | L          | L   | L   | L   | L       | U   | L   | U   | U   | L   | U   |     | H                     | U   | L   | L   | L   | L   | H   |     | H         |
| Choudhury 2020 [35] | TC v8            | GS         | 5    | Invasive         | L            | L   | L   | U          | L   | U   | U   | L       | U   | L   | L   | U   | L   | U   |     | H                     | U   | L   | U   | L   | L   | H   |     | H         |
| Choudhury 2020      | iCARE Lit        | GS         | 5    | Invasive         | L            | L   | L   | U          | L   | L   | U   | L       | U   | L   | L   | U   | L   | U   |     | H                     | U   | L   | U   | L   | L   | H   |     | H         |
| Choudhury 2020      | iCARE BPC3       | GS         | 5    | Invasive         | L            | L   | L   | U          | L   | L   | U   | L       | U   | L   | L   | U   | L   | U   |     | H                     | U   | L   | U   | L   | L   | H   |     | H         |
| Choudhury 2020      | BCRAT v3         | PLCO       | 5    | Invasive         | L            | L   | L   | U          | U   | L   | L   | U       | U   | L   | L   | U   | L   | U   |     | H                     | U   | H   | H   | L   | L   | H   |     | H         |

|                     |                       |                 |    |          |   |   |   |   |   |   |   |   |   |   |   |   |   |   |   |   |   |   |   |   |   |   |   |
|---------------------|-----------------------|-----------------|----|----------|---|---|---|---|---|---|---|---|---|---|---|---|---|---|---|---|---|---|---|---|---|---|---|
| Choudhury 2020      | iCARE Lit             | PLCO            | 5  | Invasive | L | L | L | U | U | L | L | U | U | L | L | U | L | U | H | U | H | H | L | L | H | H |   |
| Hüsing 2020 [37]    | BCRAT v3              | EPICHGermany    | 5  | Invasive | L | H | H | L | U | L | U | H | L | L | L | U | U | H | H | H | L | H | L | L | H | H |   |
| Hüsing 2020         | BCRmod                | EPICHGermany    | 5  | Invasive | L | L | L | L | U | L | U | H | L | L | L | U | U | H | H | L | L | H | L | L | H | H |   |
| Hüsing 2020         | BCRAT v3 recalibrated | EPICHGermany    | 5  | Invasive | L | H | H | L | U | L | U | H | L | L | L | U | U | H | H | H | L | H | L | L | H | H |   |
| Hüsing 2020         | BCRmod recalibrated   | EPICHGermany    | 5  | Invasive | L | L | L | L | U | L | U | H | L | L | L | U | U | H | H | L | L | H | L | L | H | H |   |
| Jee 2020 [40]       | KREA                  | KCPSHII Biobank | 5  | Invasive | L | L | L | L | L | L | L | L | L | L | L | U | U | L | U | H | L | H | U | L | L | H | H |
| Jee 2020            | KRKR                  | KCPSHII Biobank | 5  | Invasive | L | L | L | L | L | L | L | L | L | L | L | U | U | L | U | H | L | H | U | L | L | H | H |
| Terry 2019 [31]     | BCRAT v4              | ProFHSC         | 5  | Invasive | L | H | H | L | L | H | H | H | H | L | H | U | U | H | H | U | H | H | L | L | H | H |   |
| Terry 2019          | BRCAPRO v2.1H3        | ProFHSC         | 5  | Invasive | L | L | L | H | U | U | H | H | H | L | H | U | U | H | H | U | H | H | L | L | H | H |   |
| Terry 2019          | TC v8.0b              | ProFHSC         | 5  | Invasive | L | L | L | H | U | U | H | H | H | L | H | U | U | H | H | U | H | H | L | L | H | H |   |
| Terry 2019          | BOADICEA v3           | ProFHSC         | 5  | Invasive | L | L | L | H | U | U | H | H | H | L | H | U | U | H | H | U | H | H | L | L | H | H |   |
| Terry 2019          | BCRAT v4              | ProFHSC         | 10 | Invasive | L | H | H | L | L | H | H | H | H | L | H | U | H | H | L | U | H | H | L | L | H | H |   |
| Terry 2019          | BRCAPRO v2.1H3        | ProFHSC         | 10 | Invasive | L | L | L | H | U | U | H | H | H | L | H | U | H | H | L | U | H | H | L | L | H | H |   |
| Terry 2019          | TC v8.0b              | ProFHSC         | 10 | Invasive | L | L | L | H | U | U | H | H | H | L | H | U | H | H | H | U | H | H | L | L | H | H |   |
| Terry 2019          | BOADICEA v3           | ProFHSC         | 10 | Invasive | L | L | L | H | U | U | H | H | H | L | H | U | H | H | H | U | H | H | L | L | H | H |   |
| Brentnall 2018 [34] | TC v7.02              | KPWHBC SC       | 10 | Invasive | L | L | L | U | L | H | H | L | U | L | U | U | U | U | L | L | L | H | L | L | H | H |   |
| Brentnall 2018      | TC v7.02 L BD         | KPWHBC SC       | 10 | Invasive | L | L | L | U | L | H | H | L | U | L | U | U | U | U | L | L | L | H | L | L | H | H |   |
| Li 2018 [41]        | ERH                   | WHI             | 5  | Invasive | L | L | L | U | L | L | U | H | L | L | L | L | U | H | H | U | H | H | U | L | H | H |   |
| Li 2018             | ERL                   | WHI             | 5  | Invasive | L | L | L | U | L | L | U | H | L | L | L | L | U | H | H | U | H | H | U | L | H | H |   |
| Min 2014 [36]       | BCRAT v2              | WHC CGH         | 5  | Invasive | L | H | H | L | L | L | L | L | U | L | U | U | U | U | H | L | H | H | L | L | H | H |   |
| Min 2014            | AABCS                 | WHC CGH         | 5  | Invasive | L | H | H | L | L | L | L | L | U | L | U | U | U | U | H | L | H | H | L | L | H | H |   |

|                     |                      |         |    |          |   |   |   |   |   |   |   |   |   |   |   |   |   |   |   |   |   |   |   |   |   |   |   |
|---------------------|----------------------|---------|----|----------|---|---|---|---|---|---|---|---|---|---|---|---|---|---|---|---|---|---|---|---|---|---|---|
| Min 2014            | Original Korean tool | WHC CGH | 5  | Invasive | L | H | H | L | L | L | L | L | U | L | U | U | U | U | H | L | H | H | L | L | H | H |   |
| Min 2014            | Updated Korean tool  | WHC CGH | 5  | Invasive | L | H | H | L | L | L | L | L | L | U | L | U | U | U | U | H | L | H | H | L | L | H | H |
| Powell 2014 [30]    | BCRAT v2 or 3        | MWS     | 5  | Invasive | L | H | H | L | H | U | H | L | L | L | U | L | L | U | H | U | L | H | L | L | H | H |   |
| Powell 2014         | BRCAPRO v(NR)        | MWS     | 5  | Invasive | L | L | L | L | H | H | H | L | L | L | U | L | L | U | H | L | L | H | L | L | H | H |   |
| Arrospide 2013 [33] | BCRAT v1             | SCHBCSP | 5  | Invasive | L | L | L | L | L | L | L | L | H | U | L | U | L | U | H | U | H | U | H | H | H | H |   |
| Arrospide 2013      | Chen v1              | SCHBCSP | 5  | Invasive | L | L | L | H | L | L | H | L | H | U | L | U | U | U | H | H | H | U | H | H | H | H |   |
| Chay 2012 [32]      | BCRAT v2             | SBCSP   | 5  | Invasive | L | L | L | L | L | H | H | L | U | L | U | U | U | U | H | H | U | H | H | L | H | H |   |
| Chay 2012           | AABCS                | SBCSP   | 5  | Invasive | L | L | L | L | L | H | H | L | U | L | U | U | U | U | H | H | U | H | H | L | H | H |   |
| Chay 2012           | BCRAT v2             | SBCSP   | 10 | Invasive | L | L | L | L | L | H | H | L | U | L | U | U | U | U | H | H | U | H | H | L | H | H |   |
| Chay 2012           | AABCS                | SBCSP   | 10 | Invasive | L | L | L | L | L | H | H | L | U | L | U | U | U | U | H | H | U | H | H | L | H | H |   |

<sup>a</sup>Notes: i) different age groups for item 4.1 were not assessed separately (if for example an <50y age group was rated as high risk of bias then the whole item rating was high risk); ii) as studies only reported one breast cancer outcome (either invasive or invasive L DCIS) multiple outcome assessments were not required; iii) Items 4.5, 4.8 and 4.9 omitted as they are signalling questions for model development and not validation;

Key to domain and overall rating: High risk of bias: indicated as 'H'; low risk of bias: indicated as L; unclear risk of bias: indicated as 'U'
