# Supplementary material for: Breast Cancer Risk Assessment Tools for Stratifying Women into Risk Groups: A Systematic Review
Source: MDPI journal article supplement (doi:10.3390/cancers15041124), 2023-02-09
Supplement: s1 [file s1]

**Table S2: Risk predictors within risk assessment tools compared in the studies included in the review ('x': inclusion of predictor data, '-' : absence of predictor data).<sup>a</sup>**

| Risk assessment tool  | Age           | Age of menarche | Age of 1st live birth/ FTP | Age of menopause | Parity | Number of FTP | Menopausal status | HRT use | Oral contraceptive use | Breast density | Hysterectomy | BMI or weight | Height | Race and/ or ethnicity | Prior/ no. of breast biopsies | Other pathology | ADH | LCIS | History/ no. of degree relatives assessed | Age of onset of breast cancer | Bilateral breast cancer | Male breast cancer | Ovarian cancer (personal/ familial) | Alcohol intake | Smoking status | Time spent breastfeeding | HRT type/ duration of use | BRCA1/ BRCA2 status | Polygenic SNP score | Study ID                         |
|-----------------------|---------------|-----------------|----------------------------|------------------|--------|---------------|-------------------|---------|------------------------|----------------|--------------|---------------|--------|------------------------|-------------------------------|-----------------|-----|------|-------------------------------------------|-------------------------------|-------------------------|--------------------|-------------------------------------|----------------|----------------|--------------------------|---------------------------|---------------------|---------------------|----------------------------------|
| AABCS                 | x             | x               | x                          |                  |        |               |                   |         |                        |                |              |               |        |                        | x                             |                 |     |      | 1 <sup>st</sup>                           |                               |                         |                    |                                     |                |                |                          |                           |                     |                     | Chay et al 2012 [32]             |
| AABCS                 | x             | x               | x                          |                  |        |               |                   |         |                        |                |              |               |        |                        | x                             |                 |     |      | 1 <sup>st</sup>                           |                               |                         |                    |                                     |                |                |                          |                           |                     |                     | Min et al 2014 [36]              |
| BCRAT v1              | x (>35 years) | x               | x                          |                  |        |               |                   |         |                        |                |              |               |        |                        | x                             |                 |     |      | 1 <sup>st</sup>                           |                               |                         |                    |                                     |                |                |                          |                           |                     |                     | Arrospide et al 2013 [33]        |
| BCRAT v2              | x (>35 years) | x               | x                          |                  |        |               |                   |         |                        |                |              |               |        |                        | x                             |                 |     |      | 1 <sup>st</sup>                           |                               |                         |                    |                                     |                |                |                          |                           |                     |                     | Chay et al 2012 [32]             |
| BCRAT v2              | x (>35 years) | x               | x                          |                  |        |               |                   |         |                        |                |              |               |        |                        | x                             |                 |     |      | 1 <sup>st</sup>                           |                               |                         |                    |                                     |                |                |                          |                           |                     |                     | Min et al 2014 [36]              |
| BCRAT v2-3            | x (>35 years) | x               | x                          |                  |        |               |                   |         |                        |                |              |               |        |                        | -                             |                 |     |      | 1 <sup>st</sup>                           |                               |                         |                    |                                     |                |                |                          |                           |                     |                     | Powell et al 2014 [30]           |
| BCRAT v3              | x (>35 years) | x               | x                          |                  |        |               |                   |         |                        |                |              |               |        |                        | x                             |                 | x   |      | 1 <sup>st</sup>                           |                               |                         |                    |                                     |                |                |                          |                           |                     |                     | Choudhury et al 2020 (PLCO) [35] |
| BCRAT v3              | x (>35 years) | x               | x                          |                  |        |               |                   |         |                        |                |              |               |        |                        | -                             |                 | -   |      | 1 <sup>st</sup>                           |                               |                         |                    |                                     |                |                |                          |                           |                     |                     | Hüsing et al 2020 [37]           |
| BCRAT v3 recalibrated | x (>35 years) | x               | x                          |                  |        |               |                   |         |                        |                |              |               |        |                        | -                             |                 | -   |      | 1 <sup>st</sup>                           |                               |                         |                    |                                     |                |                |                          |                           |                     |                     | Hüsing et al 2020                |
| BCRAT v4              | x (>35 years) | x               | x                          |                  |        |               |                   |         |                        |                |              |               |        | x                      | x                             |                 | -   |      | 1 <sup>st</sup>                           |                               |                         |                    |                                     |                |                |                          |                           |                     |                     | Jantzen et al 2021 [39]          |
| BCRAT v4              | x (>35 years) | x               | x                          |                  |        |               |                   |         |                        |                |              |               |        | x                      | x                             |                 | x   |      | 1 <sup>st</sup>                           |                               |                         |                    |                                     |                |                |                          |                           |                     |                     | McCarthy et al 2020 [38]         |
| BCRAT v4              | x (>35 years) | x               | x                          |                  |        |               |                   |         |                        |                |              |               |        | x                      | x                             |                 | -   |      | 1 <sup>st</sup>                           |                               |                         |                    |                                     |                |                |                          |                           |                     |                     | Terry et al 2019 [31]            |
| BCRmod                | x             | x               | x                          |                  |        |               | x                 |         |                        |                | x            |               |        |                        |                               |                 |     |      | 1 <sup>st</sup>                           |                               |                         |                    | x                                   |                |                |                          |                           |                     |                     | Hüsing et al 2020 [29]           |
| BCRmod recalibrated   | x             | x               | x                          |                  |        |               | x                 |         |                        |                | x            |               |        |                        |                               |                 |     |      | 1 <sup>st</sup>                           |                               |                         |                    | x                                   |                |                |                          |                           |                     |                     | Hüsing et al 2020                |

| Risk assessment tool   | Age | Age of menarche | Age of 1st live birth/ FTP | Age of menopause | Parity | Number of FTP | Menopausal status | HRT use | Oral contraceptive use | Breast density | Hysterectomy | BMI or weight | Height | Race and/ or ethnicity | Prior/ no. of breast biopsies | Other pathology | ADH | LCIS | History/ no. of degree relatives assessed             | Age of onset of breast cancer | Bilateral breast cancer | Male breast cancer | Ovarian cancer (personal/ familial) | Alcohol intake | Smoking status | Time spent breastfeeding | HRT type/ duration of use | BRCA1/ BRCA2 status | Polygenic SNP score | Study ID                   |                                     |
|------------------------|-----|-----------------|----------------------------|------------------|--------|---------------|-------------------|---------|------------------------|----------------|--------------|---------------|--------|------------------------|-------------------------------|-----------------|-----|------|-------------------------------------------------------|-------------------------------|-------------------------|--------------------|-------------------------------------|----------------|----------------|--------------------------|---------------------------|---------------------|---------------------|----------------------------|-------------------------------------|
| BOADICEA v3            | x   |                 |                            |                  |        |               |                   |         |                        |                |              |               | x      |                        | x                             |                 |     |      | 1 <sup>st</sup><br>2 <sup>nd</sup><br>3 <sup>rd</sup> | x                             | x                       |                    | x                                   |                |                |                          | x                         |                     |                     | Terry et al 2019 [31]      |                                     |
| BRCAPRO v2.1-4         | x   |                 |                            |                  |        |               |                   |         |                        |                |              |               | x      |                        | -                             |                 | -   |      | Any                                                   | x                             | x                       |                    | x                                   |                |                |                          | -                         |                     |                     | McCarthy et al 2020 [38]   |                                     |
| BRCAPRO v NR           | x   |                 |                            |                  |        |               |                   |         |                        |                |              |               |        |                        |                               |                 | x   |      | 1 <sup>st</sup>                                       | x                             |                         |                    |                                     |                |                |                          |                           |                     |                     | Powell et al 2014 [30]     |                                     |
| BRCAPRO v2.1-3         | x   |                 |                            |                  |        |               |                   |         |                        |                |              |               | x      |                        | x                             |                 | -   |      | 1 <sup>st</sup><br>2 <sup>nd</sup><br>3 <sup>rd</sup> | x                             | x                       |                    | x                                   |                |                |                          | x                         |                     |                     | Terry et al 2019 [31]      |                                     |
| Chen v1                | x   |                 | x                          |                  |        |               |                   |         | x                      |                | x            |               |        |                        | x                             |                 |     |      | 1 <sup>st</sup>                                       |                               |                         |                    |                                     |                |                |                          |                           |                     |                     | Arrosptide et al 2013 [33] |                                     |
| ER+                    | x   | x               | x                          | x                | x      | x             |                   |         |                        |                | x            | x             |        |                        |                               |                 |     |      |                                                       |                               |                         |                    | x                                   |                | x              | x                        |                           |                     |                     | Li et al 2018 [41]         |                                     |
| ER-                    | x   | x               | x                          | x                | x      | x             |                   |         |                        |                | x            | x             |        |                        |                               |                 |     |      |                                                       |                               |                         |                    | x                                   |                | x              | x                        |                           |                     |                     | Li et al 2018              |                                     |
| i-CARE-Lit (≥50)       | x   | x               | x                          | x                | x      |               | x                 | x       |                        |                | x            | x             |        |                        | x                             |                 |     |      | 1 <sup>st</sup>                                       |                               |                         |                    | x                                   |                |                |                          | x                         |                     |                     |                            | Choudhury et al 2020 (GS) [35]      |
| i-CARE-Lit (≥50)       | x   | x               | x                          | x                | x      |               | x                 | x       |                        |                | x            | x             |        |                        | x                             |                 |     |      | 1 <sup>st</sup>                                       |                               |                         |                    | x                                   |                |                |                          | -                         |                     |                     |                            | Choudhury et al 2020 (PLCO) [35]    |
| i-CARE-Lit (≥50)       | x   | x               | x                          | x                | x      |               | x                 | x       |                        |                | x            | x             |        |                        | -                             |                 |     |      | 1 <sup>st</sup>                                       |                               |                         |                    | x                                   |                |                |                          | -                         |                     |                     |                            | Hurson et al 2021 (UK Biobank) [29] |
| i-CARE-Lit (≥50)       | x   | x               | x                          | x                | x      |               | x                 | x       |                        |                | x            | x             |        |                        | x                             |                 |     |      | 1 <sup>st</sup>                                       |                               |                         |                    | x                                   |                |                |                          | -                         |                     |                     |                            | Hurson et al 2021 (WGHS)            |
| i-CARE-Lit + PRS (≥50) | x   | x               | x                          | x                | x      |               | x                 | x       |                        |                | x            | x             |        |                        | -                             |                 |     |      | 1 <sup>st</sup>                                       |                               |                         |                    | x                                   |                |                |                          | -                         |                     | x                   |                            | Hurson et al 2021 (UK Biobank)      |
| i-CARE-Lit + PRS (≥50) | x   | x               | x                          | x                | x      |               | x                 | x       |                        |                | x            | x             |        |                        | x                             |                 |     |      | 1 <sup>st</sup>                                       |                               |                         |                    | x                                   |                |                |                          | -                         |                     | x                   |                            | Hurson et al 2021 (WGHS)            |

| Risk assessment tool    | Age | Age of menarche | Age of 1st live birth/ FTP | Age of menopause | Parity | Number of FTP | Menopausal status | HRT use | Oral contraceptive use | Breast density | Hysterectomy | BMI or weight | Height | Race and/ or ethnicity | Prior/ no. of breast biopsies | Other pathology | ADH | LCIS | History/ no. of degree relatives assessed             | Age of onset of breast cancer | Bilateral breast cancer | Male breast cancer | Ovarian cancer (personal/ familial) | Alcohol intake | Smoking status | Time spent breastfeeding | HRT type/ duration of use | BRCA1/ BRCA2 status | Polygenic SNP score | Study ID                            |
|-------------------------|-----|-----------------|----------------------------|------------------|--------|---------------|-------------------|---------|------------------------|----------------|--------------|---------------|--------|------------------------|-------------------------------|-----------------|-----|------|-------------------------------------------------------|-------------------------------|-------------------------|--------------------|-------------------------------------|----------------|----------------|--------------------------|---------------------------|---------------------|---------------------|-------------------------------------|
| i-CARE-BPC3 (≥50)       | x   | x               | x                          | x                | x      |               | x                 | x       |                        |                | x            |               |        |                        |                               |                 |     |      | 1 <sup>st</sup>                                       |                               |                         |                    | x                                   |                |                |                          |                           |                     |                     | Choudhury et al 2020 (GS) [35]      |
| i-CARE-BPC3 (≥50)       | x   | x               | x                          | x                | x      |               | x                 | x       |                        |                | x            |               |        |                        |                               |                 |     |      | 1 <sup>st</sup>                                       |                               |                         |                    | x                                   |                |                |                          |                           |                     |                     | Hurson et al 2021 (UK Biobank) [29] |
| i-CARE-BPC3 + PRS (≥50) | x   | x               | x                          | x                | x      |               | x                 | x       |                        |                | x            |               |        |                        |                               |                 |     |      | 1 <sup>st</sup>                                       |                               |                         |                    | x                                   |                |                |                          |                           |                     | x                   | Hurson et al 2021 (UK Biobank)      |
| KREA                    | x   | x               | x                          | x                | x      |               | x                 | x       | x                      |                | x            | x             |        | x                      |                               |                 |     |      | 1 <sup>st</sup>                                       |                               |                         |                    | x                                   |                |                |                          |                           |                     |                     | Jee et al 2020 [40]                 |
| KRKR                    | x   | x               | x                          | x                | x      |               | x                 | x       | x                      |                | x            | x             |        | x                      |                               |                 |     |      | 1 <sup>st</sup>                                       |                               |                         |                    | x                                   |                |                |                          |                           |                     |                     | Jee et al 2020                      |
| Korean (original)       | x   |                 | x                          |                  |        |               | x                 |         |                        |                | x            |               |        | x                      |                               |                 |     |      | 1 <sup>st</sup><br>2 <sup>nd</sup>                    |                               |                         |                    |                                     |                | x              |                          |                           |                     |                     | Min et al 2014 [36]                 |
| Korean (updated)        | x   |                 | x                          |                  |        |               | x                 |         |                        |                | x            |               |        | x                      |                               |                 |     |      | 1 <sup>st</sup><br>2 <sup>nd</sup>                    |                               |                         |                    |                                     |                | x              |                          |                           |                     |                     | Min et al 2014                      |
| TC v7                   | x   | x               | x                          | x                | x      |               | x                 |         |                        |                |              |               | x      | x                      | x                             |                 | x   | x    | 1 <sup>st</sup><br>2 <sup>nd</sup><br>3 <sup>rd</sup> |                               |                         |                    | x                                   |                |                |                          |                           |                     |                     | McCarthy et al 2020 [38]            |
| TC v7.02                | x   | x               | x                          | x                | x      |               | x                 |         |                        |                | x            | x             |        | x                      | x                             | x               | x   | x    | 1 <sup>st</sup><br>2 <sup>nd</sup>                    |                               |                         |                    | -                                   |                |                |                          |                           |                     |                     | Brentnall et al 2018 [34]           |
| TC v7.02 + BD           | x   | x               | x                          | x                | x      |               | x                 |         | x                      |                | x            | x             |        | x                      | x                             | x               | x   | x    | 1 <sup>st</sup><br>2 <sup>nd</sup>                    |                               |                         |                    | -                                   |                |                |                          |                           |                     |                     | Brentnall et al 2018                |
| TC v8                   | x   | x               | x                          | x                | x      |               | x                 | x       |                        |                | x            | x             |        |                        | -                             | -               | -   | -    | 1 <sup>st</sup>                                       |                               |                         |                    | -                                   |                |                | -                        |                           |                     |                     | Choudhury et al 2020 (GS)           |

| Risk assessment tool | Age | Age of menarche | Age of 1st live birth/ FTP | Age of menopause | Parity | Number of FTP | Menopausal status | HRT use | Oral contraceptive use | Breast density | Hysterectomy | BMI or weight | Height | Race and/ or ethnicity | Prior/ no. of breast biopsies | Other pathology | ADH | LCIS | History/ no. of degree relatives assessed             | Age of onset of breast cancer | Bilateral breast cancer | Male breast cancer | Ovarian cancer (personal/ familial) | Alcohol intake | Smoking status | Time spent breastfeeding | HRT type/ duration of use | BRCA1/ BRCA2 status | Polygenic SNP score | Study ID                     |
|----------------------|-----|-----------------|----------------------------|------------------|--------|---------------|-------------------|---------|------------------------|----------------|--------------|---------------|--------|------------------------|-------------------------------|-----------------|-----|------|-------------------------------------------------------|-------------------------------|-------------------------|--------------------|-------------------------------------|----------------|----------------|--------------------------|---------------------------|---------------------|---------------------|------------------------------|
| TC v8                | x   | x               | x                          | x                | x      |               | x                 | x       |                        |                |              | x             | x      |                        | x                             |                 | x   | x    | 1 <sup>st</sup><br>2 <sup>nd</sup>                    |                               |                         |                    | x                                   |                |                |                          | x                         |                     |                     | Jantzen et al 2021 (CC) [39] |
| TC v8.0b             | x   | x               | x                          | x                | x      | -             | -                 | x       | -                      | x              | -            | -             | -      | x                      | x                             | -               | x   | x    | 1 <sup>st</sup><br>2 <sup>nd</sup><br>3 <sup>rd</sup> | -                             |                         |                    | x                                   |                |                |                          | -                         | -                   |                     | McCarthy et al 2020 [38]     |
| TC v8.0b             | x   | x               | x                          | -                | x      | -             | x                 | x       | -                      | -              | -            | x             | x      | -                      | x                             | -               | -   | -    | 1 <sup>st</sup><br>2 <sup>nd</sup>                    | x                             |                         |                    | x                                   |                |                |                          | -                         | x                   |                     | Terry et al 2019 [31]        |

<sup>a</sup> Empty cells indicate predictor not included in tool.

Abbreviations: AABCS = Asian American Breast Cancer Study; ADH = atypical ductal hyperplasia; BCRAT = Breast Cancer Risk Assessment Tool; BCRmod = Breast Cancer Risk tool including modifiable variables; BD = breast density; BMI = body mass index; BOADICEA = Breast and Ovarian Analysis of Disease Incidence and Carrier Estimation Algorithm model; BRCA1PRO = BRCA1 probability model; ER+ = Estrogen receptor positive model ; ER- = Estrogen receptor negative model; FTP = full term pregnancy; HRT = hormone replacement therapy; i-CARE- Lit = Individualized Coherent Absolute Risk Estimation-Literature model; i-CARE- BPC3 = Individualized Coherent Absolute Risk Estimation-Breast and Prostate Cancer Consortium model; KREA = recalibrated Korean-European model; KRKR = Korean-based model; LCIS = lobular carcinoma in situ; NR = not reported; PRS = polygenic risk score; TC = Tyrer Cuzick model; v = version.
