# Supplementary material for: Breast Cancer Risk Assessment Tools for Stratifying Women into Risk Groups: A Systematic Review
Source: MDPI journal article supplement (doi:10.3390/cancers15041124), 2023-02-09
Supplement: s1 [file s1]

**Figure S1: Absolute risk calibration and observed rate of incident breast cancer for: A) tool comparisons with and without polygenic risk scores by 5-year risk; B) other risk assessment tool comparisons by 5-year risk; C) risk assessment tool comparisons by 10Hyear risk**

A) Risk assessment tool comparisons with and without polygenic risk scores by 5Hyear risk

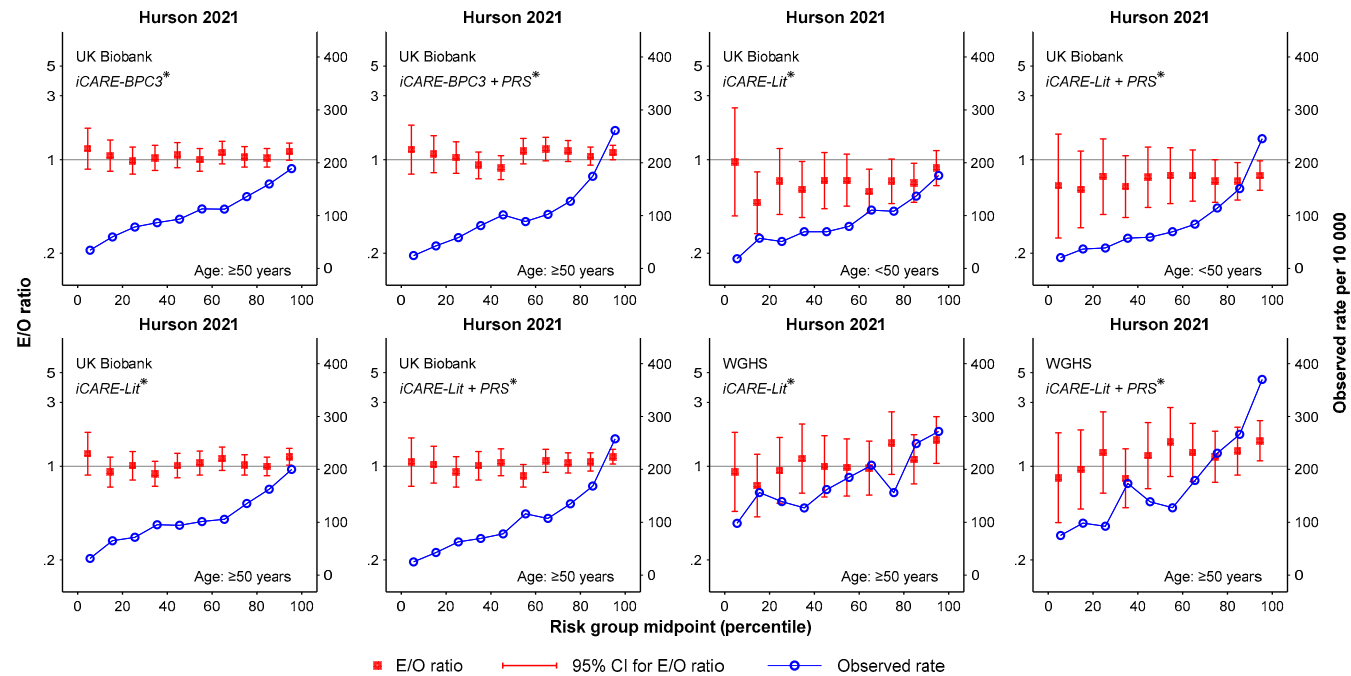

\* tools were calibrated to local population. Italicised font indicates risk tool.

Abbreviations: WGHS: Women's Genome Health Study

## B) Other risk assessment tool comparisons by 5Hyear risk

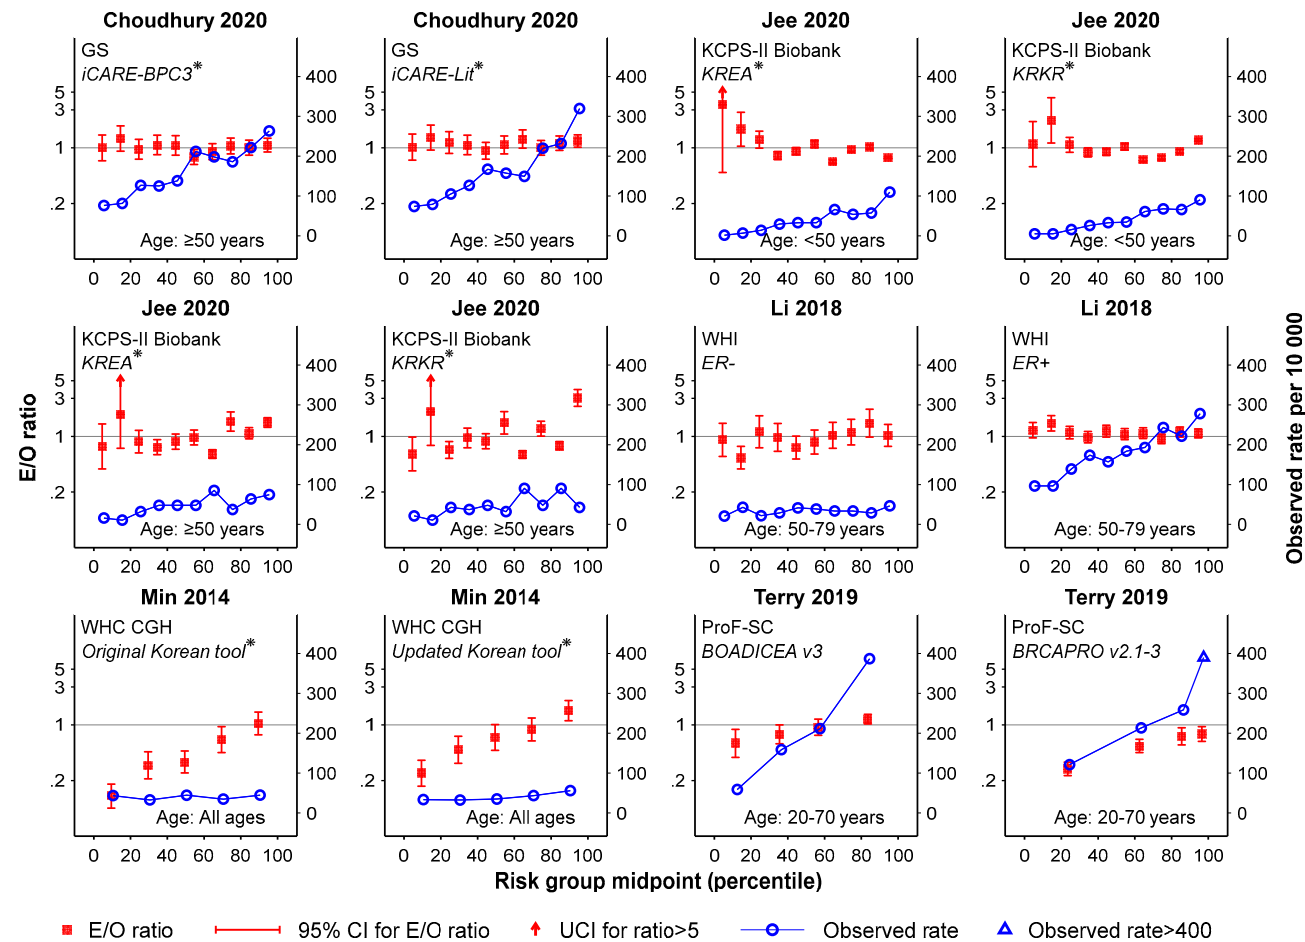

Abbreviations: GS: Generations Study; KCPSII Biobank: Korean Cancer Prevention StudyII Biobank; ProFHSC: Breast Cancer Prospective Family Study Cohort; WHC CGH: Women's Healthcare Center of Cheil General Hospital; WHI: Women's Health Initiative

### C) Risk assessment tool comparisons by 10Hyear risk

Abbreviations: KPWHBCSC: Kaiser Permanente Washington Breast Cancer Surveillance Consortium registry; ProFHSC: Breast Cancer Prospective Family Study Cohort; SBCSP: Singapore Breast Cancer Screening Project

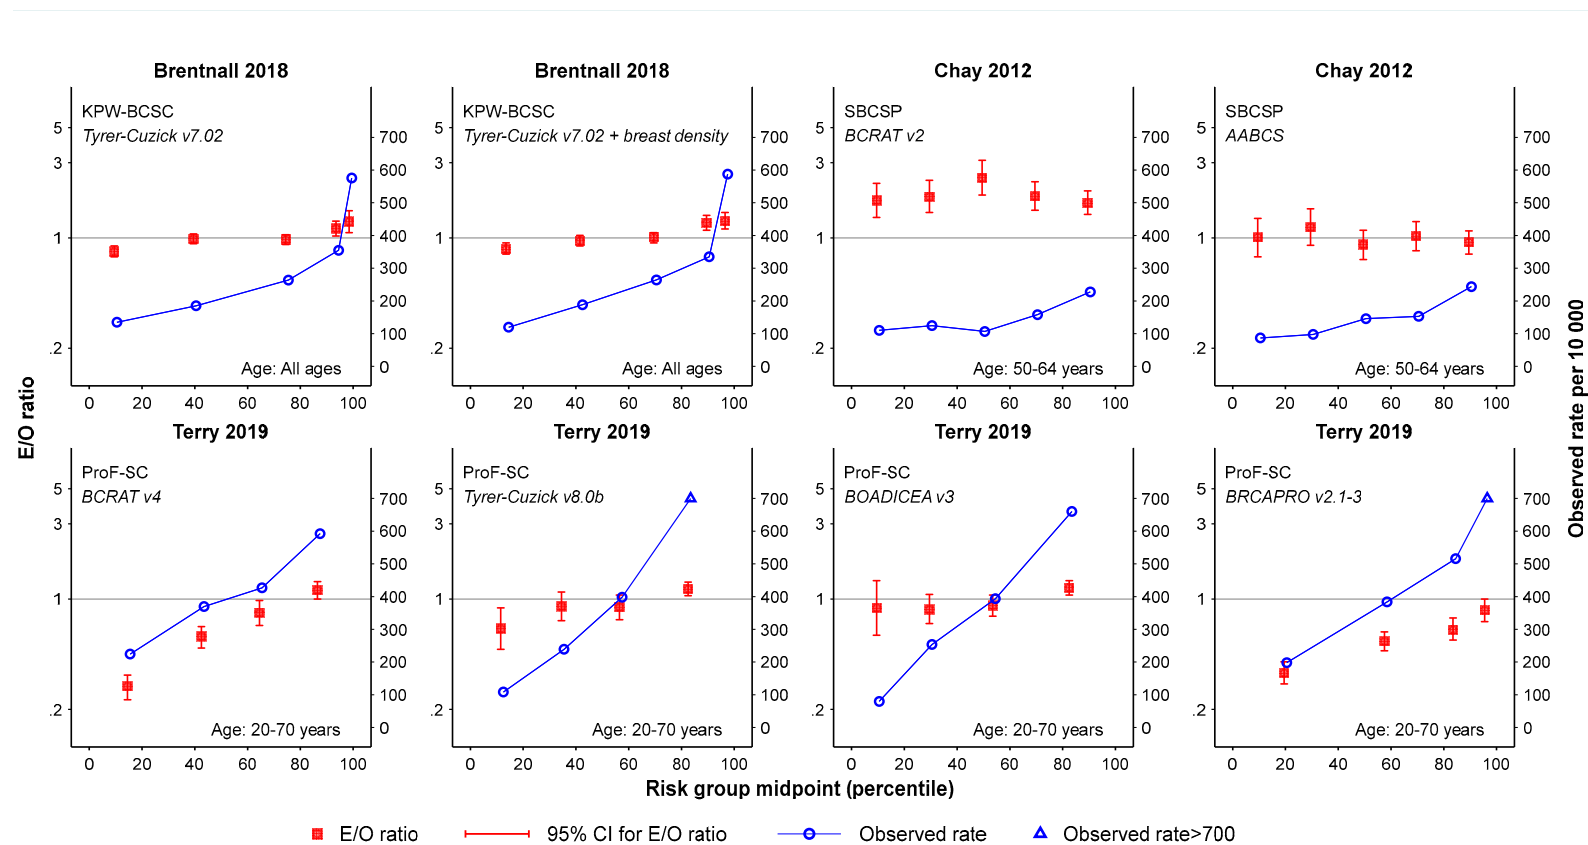

Abbreviations: KPWHBCSC: Kaiser Permanente Washington Breast Cancer Surveillance Consortium registry; ProFHSC: Breast Cancer Prospective Family Study Cohort; SBCSP: Singapore Breast Cancer Screening Project
