# Supplementary material for: Breast Cancer Risk Assessment Tools for Stratifying Women into Risk Groups: A Systematic Review
Source: MDPI journal article supplement (doi:10.3390/cancers15041124), 2023-02-09
Supplement: s1 [file s1]

**Table S1: Search strategy used to identify potentially relevant records in Medline and Embase databases**

Database(s): Embase Classic+Embase 1947 to 2021 June 30, Ovid MEDLINE(R) ALL 1946 to June 30, 2021

|    |                                                                                                                                                                      |
|----|----------------------------------------------------------------------------------------------------------------------------------------------------------------------|
| 1  | exp Breast Neoplasms/                                                                                                                                                |
| 2  | (breast adj3 (cancer* or tumour* or tumor* or carcinoma* or neoplasm* or screen*)).tw.                                                                               |
| 3  | 1 or 2                                                                                                                                                               |
| 4  | exp risk assessment/ or breast cancer risk assessment tool/                                                                                                          |
| 5  | ((risk* or susceptib* or predict*) adj6 (tool* or score* or model* or questionnaire* or instrument* or appraisal* or calculation* or calculator* or algorithm*)).tw. |
| 6  | risk factor* calculat*.tw.                                                                                                                                           |
| 7  | (risk adj2 (assess* or predict*)).tw.                                                                                                                                |
| 8  | (observed* adj4 (expected* or predict* or assigned)).tw.                                                                                                             |
| 9  | observed-to-expected.tw.                                                                                                                                             |
| 10 | expected-to-observed.tw.                                                                                                                                             |
| 11 | ("E/O" or "O/E").tw.                                                                                                                                                 |
| 12 | (validat* or calibrat* or area under the curve or c-statistic or AUC or AUROC or receiver operat*).tw.                                                               |
| 13 | (clinical conference or conference or comment or editorial).tw.                                                                                                      |
| 14 | (neoadjuvant or recurrent or recurrence or chemotherapy).tw.                                                                                                         |
| 15 | 4 or 5 or 6 or 7                                                                                                                                                     |
| 16 | 8 or 9 or 10 or 11 or 12                                                                                                                                             |
| 17 | 3 and 15 and 16                                                                                                                                                      |
| 18 | 17 not 13                                                                                                                                                            |
| 19 | 18 not 14                                                                                                                                                            |
| 20 | limit 19 to (english language and humans and yr="2008 -Current")                                                                                                     |
| 21 | remove duplicates from 20                                                                                                                                            |
