# Supplementary material for: Breast Cancer Risk Assessment Tools for Stratifying Women into Risk Groups: A Systematic Review
Source: Cancers (Basel). 2023 Feb 9;15(4):1124. doi: 10.3390/cancers15041124 (PMC9953796; doi:10.3390/cancers15041124)
Supplement: Supplementary file 1 [file cancers-15-01124-s001.zip]

Archive with 6 entries (6 files):
- Dataset S1.xlsx
- List of excluded studies L1.pdf
- Suppl Fig S1.pdf
- Suppl Table S1.pdf
- Suppl Table S2_9Feb2023.pdf
- Suppl Table S3_9Feb2023.pdf
