# Supplementary material for: Breast Cancer Risk Assessment Tools for Stratifying Women into Risk Groups: A Systematic Review
Source: Cancers (Basel). 2023 Feb 9;15(4):1124. doi: 10.3390/cancers15041124 (PMC9953796; doi:10.3390/cancers15041124)
Supplement: Supplementary file 1 [file cancers-15-01124-s001.zip › Dataset S1.xlsx]

## Sheet: Sheet1
Study	Tool	RAT Calibrated to local population?	Age range	Validation cohort acronym	No Year of risk prediction	Total number of women	Number of women per category	Risk interval (if provided)	Midpoint Percentile Risk	E/O (95%CI)	Observed numbers	Obs rate per 10,000
Jantzen 2021	Tyrer-Cuzick v8.0b	No	40-69	CARTaGENE	5	10200	3215	<1%	16	2.38 (1.35-4.19)	12	37.325
Jantzen 2021	Tyrer-Cuzick v8.0b	No	40-69	CARTaGENE	5	10200	5147	≥1% - <1.66%	57	0.78 (0.63-0.97)	84	163.202
Jantzen 2021	Tyrer-Cuzick v8.0b	No	40-69	CARTaGENE	5	10200	1600	≥1.66% - <3%	90	1.24 (0.84-1.84)	25	156.25
Jantzen 2021	Tyrer-Cuzick v8.0b	No	40-69	CARTaGENE	5	10200	238	≥3%	99	0.71 (0.38-1.32)	10	420.168
Jantzen 2021	Tyrer-Cuzick v8.0b	No	40-69	CARTaGENE	5	10200				1.02 (0.86-1.21)
Jantzen 2021	BCRAT v4	No	40-69	CARTaGENE	5	10200	3991	<1%	20	0.88 (0.63-1.24)	34	85.1917
Jantzen 2021	BCRAT v4	No	40-69	CARTaGENE	5	10200	4192	≥1% - <1.66%	60	0.81 (0.64-1.03)	66	157.443
Jantzen 2021	BCRAT v4	No	40-69	CARTaGENE	5	10200	1673	≥1.66% - <3%	88	1.51 (1.01-2.28)	23	137.478
Jantzen 2021	BCRAT v4	No	40-69	CARTaGENE	5	10200	344	≥3%	98	1.71 (0.86-3.42)	8	232.558
Jantzen 2021	BCRAT v4	No	40-69	CARTaGENE	5	10200				1.01 (0.85-1.20)
Hurson 2021	iCARE-Lit	Yes	<50	UK Biobank	5	36005	3601	0.000578-0.00238	5	0.96 (0.38-2.44)	6.62219	18.3899
Hurson 2021	iCARE-Lit	Yes	<50	UK Biobank	5	36005	3600	0.00238-0.00317	15	0.48 (0.28-0.81)	20.584	57.1779
Hurson 2021	iCARE-Lit	Yes	<50	UK Biobank	5	36005	3601	0.00317-0.00385	25	0.69 (0.39-1.21)	18.4176	51.1457
Hurson 2021	iCARE-Lit	Yes	<50	UK Biobank	5	36005	3600	0.00385-0.00449	35	0.60 (0.37-0.97)	25.0153	69.487
Hurson 2021	iCARE-Lit	Yes	<50	UK Biobank	5	36005	3601	0.00449-0.0052	45	0.70 (0.43-1.13)	25.0121	69.4586
Hurson 2021	iCARE-Lit	Yes	<50	UK Biobank	5	36005	3600	0.0052-0.00598	55	0.70 (0.45-1.10)	28.6941	79.7057
Hurson 2021	iCARE-Lit	Yes	<50	UK Biobank	5	36005	3601	0.00598-0.00691	65	0.58 (0.40-0.85)	39.7494	110.384
Hurson 2021	iCARE-Lit	Yes	<50	UK Biobank	5	36005	3600	0.00691-0.00821	75	0.69 (0.47-1.01)	38.9865	108.296
Hurson 2021	iCARE-Lit	Yes	<50	UK Biobank	5	36005	3601	0.00821-0.0105	85	0.67 (0.48-0.94)	49.2784	136.846
Hurson 2021	iCARE-Lit	Yes	<50	UK Biobank	5	36005	3600	0.0105-0.0501	95	0.87 (0.64-1.17)	63.3388	175.941
Hurson 2021	iCARE-Lit	Yes	<50	UK Biobank	5	36005				0.70 (0.62-0.78)
Hurson 2021	iCARE-Lit + PRS	Yes	<50	UK Biobank	5	36005	3601	0.000256-0.00182	5	0.64 (0.26-1.55)	7.35949	20.4374
Hurson 2021	iCARE-Lit + PRS	Yes	<50	UK Biobank	5	36005	3600	0.00182-0.00256	15	0.60 (0.31-1.16)	13.2407	36.7797
Hurson 2021	iCARE-Lit + PRS	Yes	<50	UK Biobank	5	36005	3601	0.00256-0.00327	25	0.75 (0.39-1.43)	13.9631	38.7755
Hurson 2021	iCARE-Lit + PRS	Yes	<50	UK Biobank	5	36005	3600	0.00327-0.00401	35	0.63 (0.37-1.07)	20.6346	57.3183
Hurson 2021	iCARE-Lit + PRS	Yes	<50	UK Biobank	5	36005	3601	0.00401-0.0048	45	0.74 (0.44-1.24)	21.3425	59.2683
Hurson 2021	iCARE-Lit + PRS	Yes	<50	UK Biobank	5	36005	3600	0.0048-0.00581	55	0.76 (0.47-1.23)	25	69.4444
Hurson 2021	iCARE-Lit + PRS	Yes	<50	UK Biobank	5	36005	3601	0.00581-0.00704	65	0.76 (0.49-1.18)	30.1863	83.8274
Hurson 2021	iCARE-Lit + PRS	Yes	<50	UK Biobank	5	36005	3600	0.00704-0.0089	75	0.69 (0.48-1.00)	41.1681	114.356
Hurson 2021	iCARE-Lit + PRS	Yes	<50	UK Biobank	5	36005	3601	0.0089-0.0124	85	0.69 (0.50-0.95)	54.4602	151.236
Hurson 2021	iCARE-Lit + PRS	Yes	<50	UK Biobank	5	36005	3600	0.0124-0.108	95	0.76 (0.59-0.98)	88.3797	245.499
Hurson 2021	iCARE-Lit + PRS	Yes	<50	UK Biobank	5	36005				0.72 (0.64-0.80)
Hurson 2021	iCARE-BPC3	Yes	≥50	UK Biobank	5	134920	13492	0.00155-0.00554	5	1.21 (0.85-1.72)	46.7331	34.6377
Hurson 2021	iCARE-BPC3	Yes	≥50	UK Biobank	5	134920	13492	0.00554-0.0071	15	1.07 (0.82-1.40)	80.4445	59.6238
Hurson 2021	iCARE-BPC3	Yes	≥50	UK Biobank	5	134920	13492	0.0071-0.00833	25	0.98 (0.78-1.24)	105.972	78.544
Hurson 2021	iCARE-BPC3	Yes	≥50	UK Biobank	5	134920	13492	0.00833-0.00949	35	1.03 (0.83-1.28)	116.808	86.5754
Hurson 2021	iCARE-BPC3	Yes	≥50	UK Biobank	5	134920	13492	0.00949-0.0107	45	1.08 (0.87-1.34)	125.82	93.2553
Hurson 2021	iCARE-BPC3	Yes	≥50	UK Biobank	5	134920	13492	0.0107-0.0119	55	1.00 (0.82-1.21)	151.932	112.609
Hurson 2021	iCARE-BPC3	Yes	≥50	UK Biobank	5	134920	13492	0.0119-0.0134	65	1.13 (0.93-1.37)	151.374	112.195
Hurson 2021	iCARE-BPC3	Yes	≥50	UK Biobank	5	134920	13492	0.0134-0.0153	75	1.05 (0.88-1.25)	183.45	135.97
Hurson 2021	iCARE-BPC3	Yes	≥50	UK Biobank	5	134920	13492	0.0153-0.0181	85	1.03 (0.88-1.21)	215.574	159.779
Hurson 2021	iCARE-BPC3	Yes	≥50	UK Biobank	5	134920	13492	0.0181-0.0448	95	1.15 (0.99-1.33)	255.062	189.047
Hurson 2021	iCARE-BPC3	Yes	≥50	UK Biobank	5	134920				1.07 (1.02-1.13)
Hurson 2021	iCARE-BPC3 + PRS	Yes	≥50	UK Biobank	5	134920	13492	0.000656-0.00396	5	1.19 (0.78-1.81)	32.8859	24.3744
Hurson 2021	iCARE-BPC3 + PRS	Yes	≥50	UK Biobank	5	134920	13492	0.00396-0.00542	15	1.10 (0.80-1.51)	57.7331	42.7906
Hurson 2021	iCARE-BPC3 + PRS	Yes	≥50	UK Biobank	5	134920	13492	0.00542-0.00672	25	1.04 (0.79-1.36)	78.9305	58.5017
Hurson 2021	iCARE-BPC3 + PRS	Yes	≥50	UK Biobank	5	134920	13492	0.00672-0.00807	35	0.91 (0.72-1.14)	109.596	81.2304
Hurson 2021	iCARE-BPC3 + PRS	Yes	≥50	UK Biobank	5	134920	13492	0.00807-0.00951	45	0.87 (0.71-1.07)	136.682	101.306
Hurson 2021	iCARE-BPC3 + PRS	Yes	≥50	UK Biobank	5	134920	13492	0.00951-0.0112	55	1.16 (0.93-1.44)	119.864	88.8407
Hurson 2021	iCARE-BPC3 + PRS	Yes	≥50	UK Biobank	5	134920	13492	0.0112-0.0133	65	1.20 (0.98-1.47)	138.113	102.367
Hurson 2021	iCARE-BPC3 + PRS	Yes	≥50	UK Biobank	5	134920	13492	0.0133-0.0163	75	1.16 (0.97-1.39)	171.682	127.247
Hurson 2021	iCARE-BPC3 + PRS	Yes	≥50	UK Biobank	5	134920	13492	0.0163-0.0214	85	1.06 (0.91-1.24)	235.394	174.469
Hurson 2021	iCARE-BPC3 + PRS	Yes	≥50	UK Biobank	5	134920	13492	0.0214-0.129	95	1.13 (1.00-1.28)	352.283	261.105
Hurson 2021	iCARE-BPC3 + PRS	Yes	≥50	UK Biobank	5	134920				1.08 (1.03-1.14)
Hurson 2021	iCARE-Lit	Yes	≥50	UK Biobank	5	134920	13492	0.00146-0.00519	5	1.24 (0.86-1.79)	42.3863	31.4159
Hurson 2021	iCARE-Lit	Yes	≥50	UK Biobank	5	134920	13492	0.00519-0.00661	15	0.91 (0.70-1.17)	87.6863	64.9913
Hurson 2021	iCARE-Lit	Yes	≥50	UK Biobank	5	134920	13492	0.00661-0.0078	25	1.01 (0.79-1.29)	96.4654	71.4982
Hurson 2021	iCARE-Lit	Yes	≥50	UK Biobank	5	134920	13492	0.0078-0.00892	35	0.88 (0.71-1.09)	128.641	95.3464
Hurson 2021	iCARE-Lit	Yes	≥50	UK Biobank	5	134920	13492	0.00892-0.0101	45	1.01 (0.82-1.25)	127.159	94.2476
Hurson 2021	iCARE-Lit	Yes	≥50	UK Biobank	5	134920	13492	0.0101-0.0114	55	1.06 (0.86-1.30)	136.667	101.295
Hurson 2021	iCARE-Lit	Yes	≥50	UK Biobank	5	134920	13492	0.0114-0.0129	65	1.14 (0.93-1.39)	142.459	105.588
Hurson 2021	iCARE-Lit	Yes	≥50	UK Biobank	5	134920	13492	0.0129-0.0148	75	1.02 (0.86-1.22)	182.739	135.443
Hurson 2021	iCARE-Lit	Yes	≥50	UK Biobank	5	134920	13492	0.0148-0.0182	85	1.00 (0.85-1.17)	219.275	162.522
Hurson 2021	iCARE-Lit	Yes	≥50	UK Biobank	5	134920	13492	0.0182-0.0783	95	1.18 (1.02-1.36)	269.665	199.87
Hurson 2021	iCARE-Lit	Yes	≥50	UK Biobank	5	134920				1.05 (0.99-1.10)
Hurson 2021	iCARE-Lit + PRS	Yes	≥50	UK Biobank	5	134920	13492	0.00061-0.00368	5	1.08 (0.71-1.63)	33.6131	24.9133
Hurson 2021	iCARE-Lit + PRS	Yes	≥50	UK Biobank	5	134920	13492	0.00368-0.00507	15	1.03 (0.75-1.41)	57.7393	42.7952
Hurson 2021	iCARE-Lit + PRS	Yes	≥50	UK Biobank	5	134920	13492	0.00507-0.00633	25	0.91 (0.70-1.18)	84.7772	62.8352
Hurson 2021	iCARE-Lit + PRS	Yes	≥50	UK Biobank	5	134920	13492	0.00633-0.00764	35	1.01 (0.79-1.29)	93.5371	69.3278
Hurson 2021	iCARE-Lit + PRS	Yes	≥50	UK Biobank	5	134920	13492	0.00764-0.00905	45	1.07 (0.85-1.35)	105.235	77.9981
Hurson 2021	iCARE-Lit + PRS	Yes	≥50	UK Biobank	5	134920	13492	0.00905-0.0107	55	0.85 (0.70-1.03)	156.399	115.92
Hurson 2021	iCARE-Lit + PRS	Yes	≥50	UK Biobank	5	134920	13492	0.0107-0.0129	65	1.10 (0.90-1.34)	144.682	107.236
Hurson 2021	iCARE-Lit + PRS	Yes	≥50	UK Biobank	5	134920	13492	0.0129-0.0159	75	1.06 (0.89-1.26)	181.998	134.894
Hurson 2021	iCARE-Lit + PRS	Yes	≥50	UK Biobank	5	134920	13492	0.0159-0.0213	85	1.08 (0.92-1.26)	227.266	168.445
Hurson 2021	iCARE-Lit + PRS	Yes	≥50	UK Biobank	5	134920	13492	0.0213-0.153	95	1.18 (1.04-1.34)	347.898	257.855
Hurson 2021	iCARE-Lit + PRS	Yes	≥50	UK Biobank	5	134920				1.06 (1.01-1.12)
Hurson 2021	iCARE-Lit	Yes	≥50	WGHS	5	17001	1700	0.00181-0.0103	5	0.91 (0.46-1.79)	16.6475	97.9263
Hurson 2021	iCARE-Lit	Yes	≥50	WGHS	5	17001	1700	0.0103-0.0121	15	0.72 (0.42-1.23)	26.5625	156.25
Hurson 2021	iCARE-Lit	Yes	≥50	WGHS	5	17001	1700	0.0121-0.0137	25	0.93 (0.53-1.64)	23.6248	138.969
Hurson 2021	iCARE-Lit	Yes	≥50	WGHS	5	17001	1700	0.0137-0.0153	35	1.14 (0.63-2.07)	21.606	127.094
Hurson 2021	iCARE-Lit	Yes	≥50	WGHS	5	17001	1700	0.0153-0.0171	45	1.00 (0.59-1.69)	27.4986	161.756
Hurson 2021	iCARE-Lit	Yes	≥50	WGHS	5	17001	1700	0.0171-0.019	55	0.98 (0.60-1.60)	31.4451	184.971
Hurson 2021	iCARE-Lit	Yes	≥50	WGHS	5	17001	1700	0.019-0.0215	65	0.97 (0.61-1.54)	35.3349	207.852
Hurson 2021	iCARE-Lit	Yes	≥50	WGHS	5	17001	1700	0.0215-0.0252	75	1.49 (0.87-2.55)	26.5165	155.979
Hurson 2021	iCARE-Lit	Yes	≥50	WGHS	5	17001	1700	0.0252-0.0318	85	1.13 (0.74-1.72)	42.3032	248.843
Hurson 2021	iCARE-Lit	Yes	≥50	WGHS	5	17001	1700	0.0318-0.152	95	1.57 (1.05-2.35)	46.185	271.676
Hurson 2021	iCARE-Lit	Yes	≥50	WGHS	5	17001				1.12 (1.00-1.25)
Hurson 2021	iCARE-Lit + PRS	Yes	≥50	WGHS	5	17001	1700	0.000888-0.00805	5	0.82 (0.38-1.78)	12.7451	74.9712
Hurson 2021	iCARE-Lit + PRS	Yes	≥50	WGHS	5	17001	1700	0.00805-0.0106	15	0.95 (0.48-1.87)	16.7149	98.3227
Hurson 2021	iCARE-Lit + PRS	Yes	≥50	WGHS	5	17001	1700	0.0106-0.0129	25	1.27 (0.63-2.55)	15.7135	92.4321
Hurson 2021	iCARE-Lit + PRS	Yes	≥50	WGHS	5	17001	1700	0.0129-0.0153	35	0.81 (0.49-1.35)	29.4798	173.41
Hurson 2021	iCARE-Lit + PRS	Yes	≥50	WGHS	5	17001	1700	0.0153-0.018	45	1.20 (0.68-2.12)	23.5838	138.728
Hurson 2021	iCARE-Lit + PRS	Yes	≥50	WGHS	5	17001	1700	0.018-0.0209	55	1.52 (0.84-2.75)	21.6435	127.315
Hurson 2021	iCARE-Lit + PRS	Yes	≥50	WGHS	5	17001	1700	0.0209-0.0246	65	1.27 (0.77-2.09)	30.4273	178.984
Hurson 2021	iCARE-Lit + PRS	Yes	≥50	WGHS	5	17001	1700	0.0246-0.0303	75	1.18 (0.76-1.83)	39.2157	230.681
Hurson 2021	iCARE-Lit + PRS	Yes	≥50	WGHS	5	17001	1700	0.0303-0.0402	85	1.30 (0.86-1.96)	45.2808	266.358
Hurson 2021	iCARE-Lit + PRS	Yes	≥50	WGHS	5	17001	1700	0.0402-0.115	95	1.55 (1.10-2.19)	62.9265	370.156
Hurson 2021	iCARE-Lit + PRS	Yes	≥50	WGHS	5	17001				1.25 (1.12-1.40)
McCarthy 2020	Tyrer-Cuzick v7	No	40-84	Newton-Wellesley Hospital	6	35921	3592		5	0.97 (0.68-1.38)	31	86.3029
McCarthy 2020	Tyrer-Cuzick v7	No	40-84	Newton-Wellesley Hospital	6	35921	3592		15	0.88 (0.66-1.18)	45	125.278
McCarthy 2020	Tyrer-Cuzick v7	No	40-84	Newton-Wellesley Hospital	6	35921	3592		25	0.82 (0.63-1.07)	56	155.902
McCarthy 2020	Tyrer-Cuzick v7	No	40-84	Newton-Wellesley Hospital	6	35921	3592		35	1.19 (0.88-1.60)	44	122.494
McCarthy 2020	Tyrer-Cuzick v7	No	40-84	Newton-Wellesley Hospital	6	35921	3592		45	1.38 (1.02-1.87)	42	116.927
McCarthy 2020	Tyrer-Cuzick v7	No	40-84	Newton-Wellesley Hospital	6	35921	3592		55	1.14 (0.88-1.47)	57	158.686
McCarthy 2020	Tyrer-Cuzick v7	No	40-84	Newton-Wellesley Hospital	6	35921	3592		65	0.93 (0.74-1.16)	79	219.933
McCarthy 2020	Tyrer-Cuzick v7	No	40-84	Newton-Wellesley Hospital	6	35921	3592		75	1.13 (0.90-1.41)	76	211.581
McCarthy 2020	Tyrer-Cuzick v7	No	40-84	Newton-Wellesley Hospital	6	35921	3592		85	1.30 (1.05-1.62)	82	228.285
McCarthy 2020	Tyrer-Cuzick v7	No	40-84	Newton-Wellesley Hospital	6	35921	3592		95	1.21 (1.02-1.43)	135	375.835
McCarthy 2020	Tyrer-Cuzick v7	No	40-84	Newton-Wellesley Hospital	6	35921	3592			1.11 (1.04-1.19)
McCarthy 2020	Tyrer-Cuzick v8.0b	No	40-84	Newton-Wellesley Hospital	6	35921	3592		5	0.70 (0.50-0.96)	36	100.223
McCarthy 2020	Tyrer-Cuzick v8.0b	No	40-84	Newton-Wellesley Hospital	6	35921	3592		15	1.02 (0.74-1.42)	36	100.223
McCarthy 2020	Tyrer-Cuzick v8.0b	No	40-84	Newton-Wellesley Hospital	6	35921	3592		25	0.91 (0.69-1.20)	49	136.414
McCarthy 2020	Tyrer-Cuzick v8.0b	No	40-84	Newton-Wellesley Hospital	6	35921	3592		35	1.04 (0.79-1.37)	50	139.198
McCarthy 2020	Tyrer-Cuzick v8.0b	No	40-84	Newton-Wellesley Hospital	6	35921	3592		45	1.38 (1.02-1.86)	43	119.71
McCarthy 2020	Tyrer-Cuzick v8.0b	No	40-84	Newton-Wellesley Hospital	6	35921	3592		55	1.13 (0.88-1.46)	60	167.038
McCarthy 2020	Tyrer-Cuzick v8.0b	No	40-84	Newton-Wellesley Hospital	6	35921	3592		65	1.29 (1.00-1.66)	61	169.822
McCarthy 2020	Tyrer-Cuzick v8.0b	No	40-84	Newton-Wellesley Hospital	6	35921	3592		75	1.16 (0.93-1.44)	81	225.501
McCarthy 2020	Tyrer-Cuzick v8.0b	No	40-84	Newton-Wellesley Hospital	6	35921	3592		85	1.16 (0.95-1.41)	102	283.964
McCarthy 2020	Tyrer-Cuzick v8.0b	No	40-84	Newton-Wellesley Hospital	6	35921	3592		95	1.48 (1.24-1.76)	129	359.131
McCarthy 2020	Tyrer-Cuzick v8.0b	No	40-84	Newton-Wellesley Hospital	6	35921	3592			1.19 (1.10-1.27)
McCarthy 2020	BCRAT v4	Yes	40-84	NWH	6	35921	3592		5	1.25 (0.83-1.89)	23	64.0312
McCarthy 2020	BCRAT v4	Yes	40-84	NWH	6	35921	3592		15	0.93 (0.69-1.27)	41	114.143
McCarthy 2020	BCRAT v4	Yes	40-84	NWH	6	35921	3592		25	1.06 (0.79-1.44)	42	116.927
McCarthy 2020	BCRAT v4	Yes	40-84	NWH	6	35921	3592		35	1.08 (0.80-1.44)	44	122.494
McCarthy 2020	BCRAT v4	Yes	40-84	NWH	6	35921	3592		45	0.95 (0.74-1.24)	57	158.686
McCarthy 2020	BCRAT v4	Yes	40-84	NWH	6	35921	3592		55	1.28 (0.97-1.70)	48	133.63
McCarthy 2020	BCRAT v4	Yes	40-84	NWH	6	35921	3592		65	0.93 (0.74-1.16)	74	206.013
McCarthy 2020	BCRAT v4	Yes	40-84	NWH	6	35921	3592		75	0.93 (0.75-1.15)	84	233.853
McCarthy 2020	BCRAT v4	Yes	40-84	NWH	6	35921	3592		85	0.87 (0.72-1.05)	107	297.884
McCarthy 2020	BCRAT v4	Yes	40-84	NWH	6	35921	3592		95	1.15 (0.97-1.37)	127	353.563
McCarthy 2020	BCRAT v4	Yes	40-84	NWH	6	35921	3592			1.02 (0.94-1.10)
McCarthy 2020	BRCAPRO v2.1-4	Yes	40-84	NWH	6	35921	3592		5	1.14 (0.78-1.67)	27	75.167
McCarthy 2020	BRCAPRO v2.1-4	Yes	40-84	NWH	6	35921	3592		15	0.91 (0.68-1.20)	48	133.63
McCarthy 2020	BRCAPRO v2.1-4	Yes	40-84	NWH	6	35921	3592		25	0.82 (0.62-1.10)	47	130.846
McCarthy 2020	BRCAPRO v2.1-4	Yes	40-84	NWH	6	35921	3592		35	1.01 (0.78-1.32)	55	153.118
McCarthy 2020	BRCAPRO v2.1-4	Yes	40-84	NWH	6	35921	3592		45	1.18 (0.87-1.59)	43	119.71
McCarthy 2020	BRCAPRO v2.1-4	Yes	40-84	NWH	6	35921	3592		55	1.02 (0.80-1.31)	63	175.39
McCarthy 2020	BRCAPRO v2.1-4	Yes	40-84	NWH	6	35921	3592		65	1.15 (0.90-1.47)	64	178.174
McCarthy 2020	BRCAPRO v2.1-4	Yes	40-84	NWH	6	35921	3592		75	0.90 (0.74-1.10)	96	267.261
McCarthy 2020	BRCAPRO v2.1-4	Yes	40-84	NWH	6	35921	3592		85	1.08 (0.89-1.33)	95	264.477
McCarthy 2020	BRCAPRO v2.1-4	Yes	40-84	NWH	6	35921	3592		95	1.27 (1.05-1.53)	109	303.452
McCarthy 2020	BRCAPRO v2.1-4	Yes	40-84	NWH	6	35921	3592			1.06 (0.75-1.41)
Choudhury 2020	Tyrer-Cuzick v8	Yes	<50	GS	5	28232	2820		5	1.29 (0.62-2.72)	7	24.8227
Choudhury 2020	Tyrer-Cuzick v8	Yes	<50	GS	5	28232	2844		15	0.99 (0.59-1.68)	14	49.2264
Choudhury 2020	Tyrer-Cuzick v8	Yes	<50	GS	5	28232	2800		25	1.02 (0.64-1.64)	17	60.7143
Choudhury 2020	Tyrer-Cuzick v8	Yes	<50	GS	5	28232	2833		35	1.06 (0.68-1.64)	20	70.5965
Choudhury 2020	Tyrer-Cuzick v8	Yes	<50	GS	5	28232	2835		45	0.95 (0.65-1.39)	26	91.7108
Choudhury 2020	Tyrer-Cuzick v8	Yes	<50	GS	5	28232	2737		55	1.70 (1.04-2.77)	16	58.4582
Choudhury 2020	Tyrer-Cuzick v8	Yes	<50	GS	5	28232	2887		65	0.91 (0.66-1.26)	36	124.697
Choudhury 2020	Tyrer-Cuzick v8	Yes	<50	GS	5	28232	2794		75	1.32 (0.91-1.90)	28	100.215
Choudhury 2020	Tyrer-Cuzick v8	Yes	<50	GS	5	28232	2848		85	1.18 (0.87-1.62)	39	136.938
Choudhury 2020	Tyrer-Cuzick v8	Yes	<50	GS	5	28232	2834		95	1.18 (0.92-1.51)	62	218.772
Choudhury 2020	Tyrer-Cuzick v8	Yes	<50	GS	5	28232	2865.33			1.14 (1.01-1.29)
Choudhury 2020	iCARE-Lit	Yes	<50	GS	5	28232	2847		5	0.89 (0.44-1.77)	8	28.0998
Choudhury 2020	iCARE-Lit	Yes	<50	GS	5	28232	2804		15	0.63 (0.39-1.00)	17	60.6277
Choudhury 2020	iCARE-Lit	Yes	<50	GS	5	28232	2829		25	1.24 (0.69-2.23)	11	38.883
Choudhury 2020	iCARE-Lit	Yes	<50	GS	5	28232	2808		35	0.71 (0.47-1.07)	23	81.9088
Choudhury 2020	iCARE-Lit	Yes	<50	GS	5	28232	2820		45	0.97 (0.62-1.50)	20	70.922
Choudhury 2020	iCARE-Lit	Yes	<50	GS	5	28232	2827		55	0.94 (0.63-1.40)	24	84.8956
Choudhury 2020	iCARE-Lit	Yes	<50	GS	5	28232	2759		65	1.17 (0.77-1.77)	22	79.739
Choudhury 2020	iCARE-Lit	Yes	<50	GS	5	28232	2906		75	0.93 (0.67-1.30)	35	120.44
Choudhury 2020	iCARE-Lit	Yes	<50	GS	5	28232	2798		85	0.97 (0.72-1.31)	42	150.107
Choudhury 2020	iCARE-Lit	Yes	<50	GS	5	28232	2834		95	1.13 (0.89-1.44)	63	222.301
Choudhury 2020	iCARE-Lit	Yes	<50	GS	5	28232	2870			0.98 (0.87-1.11)
Choudhury 2020	Tyrer-Cuzick v8	Yes	≥50	GS	5	36642	3665		5	0.93 (0.64-1.35)	28	76.3984
Choudhury 2020	Tyrer-Cuzick v8	Yes	≥50	GS	5	36642	3570		15	1.25 (0.88-1.78)	31	86.8347
Choudhury 2020	Tyrer-Cuzick v8	Yes	≥50	GS	5	36642	3846		25	1.15 (0.85-1.56)	42	109.204
Choudhury 2020	Tyrer-Cuzick v8	Yes	≥50	GS	5	36642	3574		35	1.40 (1.01-1.93)	36	100.727
Choudhury 2020	Tyrer-Cuzick v8	Yes	≥50	GS	5	36642	3556		45	0.99 (0.76-1.29)	55	154.668
Choudhury 2020	Tyrer-Cuzick v8	Yes	≥50	GS	5	36642	3677		55	0.92 (0.72-1.16)	68	184.933
Choudhury 2020	Tyrer-Cuzick v8	Yes	≥50	GS	5	36642	3716		65	0.83 (0.67-1.02)	85	228.741
Choudhury 2020	Tyrer-Cuzick v8	Yes	≥50	GS	5	36642	3708		75	1.20 (0.95-1.52)	68	183.387
Choudhury 2020	Tyrer-Cuzick v8	Yes	≥50	GS	5	36642	3679		85	1.39 (1.10-1.74)	73	198.423
Choudhury 2020	Tyrer-Cuzick v8	Yes	≥50	GS	5	36642	3651		95	1.30 (1.08-1.56)	112	306.765
Choudhury 2020	Tyrer-Cuzick v8	Yes	≥50	GS	5	36642				1.13 (1.05-1.23)
Choudhury 2020	iCARE-Lit	Yes	≥50	GS	5	36642	3662		5	1.02 (0.70-1.49)	27	73.7302
Choudhury 2020	iCARE-Lit	Yes	≥50	GS	5	36642	3669		15	1.35 (0.94-1.93)	29	79.0406
Choudhury 2020	iCARE-Lit	Yes	≥50	GS	5	36642	3613		25	1.17 (0.85-1.60)	38	105.176
Choudhury 2020	iCARE-Lit	Yes	≥50	GS	5	36642	3707		35	1.08 (0.82-1.44)	47	126.787
Choudhury 2020	iCARE-Lit	Yes	≥50	GS	5	36642	3705		45	0.92 (0.72-1.17)	62	167.341
Choudhury 2020	iCARE-Lit	Yes	≥50	GS	5	36642	3618		55	1.09 (0.84-1.41)	57	157.546
Choudhury 2020	iCARE-Lit	Yes	≥50	GS	5	36642	3613		65	1.29 (0.99-1.68)	54	149.46
Choudhury 2020	iCARE-Lit	Yes	≥50	GS	5	36642	3729		75	1.00 (0.81-1.24)	82	219.898
Choudhury 2020	iCARE-Lit	Yes	≥50	GS	5	36642	3666		85	1.14 (0.93-1.41)	85	231.86
Choudhury 2020	iCARE-Lit	Yes	≥50	GS	5	36642	3660		95	1.22 (1.02-1.46)	117	319.672
Choudhury 2020	iCARE-Lit	Yes	≥50	GS	5	36642				1.13 (1.04-1.22)
Choudhury 2020	iCARE-BPC3	Yes	≥50	GS	5	36642	3673		5	1.00 (0.69-1.45)	28	76.232
Choudhury 2020	iCARE-BPC3	Yes	≥50	GS	5	36642	3558		15	1.31 (0.91-1.89)	29	81.5065
Choudhury 2020	iCARE-BPC3	Yes	≥50	GS	5	36642	3701		25	0.96 (0.72-1.28)	47	126.993
Choudhury 2020	iCARE-BPC3	Yes	≥50	GS	5	36642	3755		35	1.08 (0.82-1.44)	47	125.166
Choudhury 2020	iCARE-BPC3	Yes	≥50	GS	5	36642	3543		45	1.07 (0.81-1.42)	49	138.301
Choudhury 2020	iCARE-BPC3	Yes	≥50	GS	5	36642	3777		55	0.77 (0.62-0.95)	80	211.808
Choudhury 2020	iCARE-BPC3	Yes	≥50	GS	5	36642	3532		65	0.90 (0.71-1.13)	70	198.188
Choudhury 2020	iCARE-BPC3	Yes	≥50	GS	5	36642	3763		75	1.06 (0.84-1.33)	70	186.022
Choudhury 2020	iCARE-BPC3	Yes	≥50	GS	5	36642	3656		85	1.01 (0.81-1.25)	81	221.554
Choudhury 2020	iCARE-BPC3	Yes	≥50	GS	5	36642	3684		95	1.08 (0.89-1.32)	97	263.301
Choudhury 2020	iCARE-BPC3	Yes	≥50	GS	5	36642				1.00 (0.93-1.09)
Choudhury 2020	BCRAT v3	Yes	50-75	PLCO	5	48279	4828		5	0.68 (0.54-0.86)	67	138.774
Choudhury 2020	BCRAT v3	Yes	50-75	PLCO	5	48279	4828		15	0.62 (0.50-0.76)	88	182.27
Choudhury 2020	BCRAT v3	Yes	50-75	PLCO	5	48279	4828		25	0.83 (0.66-1.04)	77	159.486
Choudhury 2020	BCRAT v3	Yes	50-75	PLCO	5	48279	4828		35	0.76 (0.61-0.95)	79	163.629
Choudhury 2020	BCRAT v3	Yes	50-75	PLCO	5	48279	4828		45	0.79 (0.64-0.97)	90	186.413
Choudhury 2020	BCRAT v3	Yes	50-75	PLCO	5	48279	4828		55	0.88 (0.71-1.09)	85	176.056
Choudhury 2020	BCRAT v3	Yes	50-75	PLCO	5	48279	4828		65	0.69 (0.58-0.82)	121	250.621
Choudhury 2020	BCRAT v3	Yes	50-75	PLCO	5	48279	4828		75	0.91 (0.75-1.10)	105	217.481
Choudhury 2020	BCRAT v3	Yes	50-75	PLCO	5	48279	4828		85	0.81 (0.69-0.95)	145	300.331
Choudhury 2020	BCRAT v3	Yes	50-75	PLCO	5	48279	4828		95	1.22 (1.04-1.43)	151	312.759
Choudhury 2020	BCRAT v3	Yes	50-75	PLCO	5	48279	4828			0.80 (0.80-0.90)
Choudhury 2020	iCARE-Lit	Yes	50-75	PLCO	5	48279	4828		5	0.96 (0.73-1.26)	51	105.634
Choudhury 2020	iCARE-Lit	Yes	50-75	PLCO	5	48279	4828		15	0.96 (0.76-1.21)	70	144.988
Choudhury 2020	iCARE-Lit	Yes	50-75	PLCO	5	48279	4828		25	1.09 (0.87-1.37)	74	153.273
Choudhury 2020	iCARE-Lit	Yes	50-75	PLCO	5	48279	4828		35	1.41 (1.11-1.79)	66	136.703
Choudhury 2020	iCARE-Lit	Yes	50-75	PLCO	5	48279	4828		45	1.07 (0.88-1.30)	98	202.983
Choudhury 2020	iCARE-Lit	Yes	50-75	PLCO	5	48279	4828		55	1.09 (0.90-1.31)	107	221.624
Choudhury 2020	iCARE-Lit	Yes	50-75	PLCO	5	48279	4828		65	1.28 (1.06-1.55)	102	211.268
Choudhury 2020	iCARE-Lit	Yes	50-75	PLCO	5	48279	4828		75	1.14 (0.96-1.35)	129	267.191
Choudhury 2020	iCARE-Lit	Yes	50-75	PLCO	5	48279	4828		85	1.22 (1.04-1.43)	142	294.118
Choudhury 2020	iCARE-Lit	Yes	50-75	PLCO	5	48279	4828		95	1.34 (1.16-1.55)	169	350.041
Choudhury 2020	iCARE-Lit	Yes	50-75	PLCO	5	48279	4828			1.20 (1.10-1.30)
Hüsing 2020	BCRAT v3	No	≥40	EPIC-Germany	5	22098	2210		5	1.22 (0.66-2.25)	10.2822	46.1552
Hüsing 2020	BCRAT v3	No	≥40	EPIC-Germany	5	22098	2210		15	1.33 (0.75-2.35)	11.8954	53.3964
Hüsing 2020	BCRAT v3	No	≥40	EPIC-Germany	5	22098	2210		25	0.98 (0.62-1.54)	18.7502	84.1666
Hüsing 2020	BCRAT v3	No	≥40	EPIC-Germany	5	22098	2210		35	1.14 (0.72-1.80)	18.348	82.3613
Hüsing 2020	BCRAT v3	No	≥40	EPIC-Germany	5	22098	2210		45	0.86 (0.59-1.25)	27.2071	122.128
Hüsing 2020	BCRAT v3	No	≥40	EPIC-Germany	5	22098	2210		55	0.75 (0.54-1.05)	34.4773	154.763
Hüsing 2020	BCRAT v3	No	≥40	EPIC-Germany	5	22098	2210		65	1.01 (0.70-1.46)	28.2324	126.731
Hüsing 2020	BCRAT v3	No	≥40	EPIC-Germany	5	22098	2210		75	0.93 (0.66-1.30)	34.2762	153.861
Hüsing 2020	BCRAT v3	No	≥40	EPIC-Germany	5	22098	2210		85	1.12 (0.79-1.58)	32.6564	146.59
Hüsing 2020	BCRAT v3	No	≥40	EPIC-Germany	5	22098	2210		95	1.22 (0.90-1.65)	41.9177	188.162
Hüsing 2020	BCRAT v3	No	≥40	EPIC-Germany	5	22098	2210			1.03 (0.90-1.15)
Hüsing 2020	BCRmod	No	≥40	EPIC-Germany	5	22098	2210		5	1.48 (0.73-2.99)	7.86468	35.3033
Hüsing 2020	BCRmod	No	≥40	EPIC-Germany	5	22098	2210		15	1.08 (0.63-1.85)	13.5085	60.6376
Hüsing 2020	BCRmod	No	≥40	EPIC-Germany	5	22098	2210		25	1.17 (0.70-1.94)	14.9206	66.9762
Hüsing 2020	BCRmod	No	≥40	EPIC-Germany	5	22098	2210		35	0.83 (0.56-1.23)	24.8006	111.326
Hüsing 2020	BCRmod	No	≥40	EPIC-Germany	5	22098	2210		45	0.96 (0.65-1.43)	24.7895	111.276
Hüsing 2020	BCRmod	No	≥40	EPIC-Germany	5	22098	2210		55	1.13 (0.76-1.69)	24.1951	108.608
Hüsing 2020	BCRmod	No	≥40	EPIC-Germany	5	22098	2210		65	0.95 (0.67-1.34)	32.6631	146.619
Hüsing 2020	BCRmod	No	≥40	EPIC-Germany	5	22098	2210		75	1.00 (0.72-1.39)	35.0828	157.481
Hüsing 2020	BCRmod	No	≥40	EPIC-Germany	5	22098	2210		85	1.16 (0.83-1.62)	35.2839	158.384
Hüsing 2020	BCRmod	No	≥40	EPIC-Germany	5	22098	2210		95	1.27 (0.94-1.70)	44.9407	201.732
Hüsing 2020	BCRmod	No	≥40	EPIC-Germany	5	22098	2210			1.08 (0.95-1.21)
Hüsing 2020	BCRAT v3 recalibrated	Yes	≥40	EPIC-Germany	5	22098	2210		5	1.21 (0.63-2.32)	9.07474	41.0622
Hüsing 2020	BCRAT v3 recalibrated	Yes	≥40	EPIC-Germany	5	22098	2210		15	1.35 (0.74-2.46)	10.6844	48.3458
Hüsing 2020	BCRAT v3 recalibrated	Yes	≥40	EPIC-Germany	5	22098	2210		25	0.80 (0.52-1.22)	21.3722	96.7066
Hüsing 2020	BCRAT v3 recalibrated	Yes	≥40	EPIC-Germany	5	22098	2210		35	0.98 (0.63-1.52)	19.7592	89.408
Hüsing 2020	BCRAT v3 recalibrated	Yes	≥40	EPIC-Germany	5	22098	2210		45	0.80 (0.54-1.17)	26.4029	119.47
Hüsing 2020	BCRAT v3 recalibrated	Yes	≥40	EPIC-Germany	5	22098	2210		55	0.83 (0.57-1.21)	27.217	123.154
Hüsing 2020	BCRAT v3 recalibrated	Yes	≥40	EPIC-Germany	5	22098	2210		65	0.72 (0.52-1.00)	34.881	157.832
Hüsing 2020	BCRAT v3 recalibrated	Yes	≥40	EPIC-Germany	5	22098	2210		75	0.84 (0.60-1.19)	32.2599	145.972
Hüsing 2020	BCRAT v3 recalibrated	Yes	≥40	EPIC-Germany	5	22098	2210		85	0.95 (0.67-1.34)	32.2623	145.983
Hüsing 2020	BCRAT v3 recalibrated	Yes	≥40	EPIC-Germany	5	22098	2210		95	0.99 (0.73-1.32)	44.1313	199.689
Hüsing 2020	BCRAT v3 recalibrated	Yes	≥40	EPIC-Germany	5	22098	2210			0.90 (0.79-1.01)
Hüsing 2020	BCRmod recalibrated	Yes	≥40	EPIC-Germany	5	22098	2210		5	1.03 (0.54-1.97)	9.07344	41.0563
Hüsing 2020	BCRmod recalibrated	Yes	≥40	EPIC-Germany	5	22098	2210		15	0.94 (0.54-1.63)	12.7019	57.4748
Hüsing 2020	BCRmod recalibrated	Yes	≥40	EPIC-Germany	5	22098	2210		25	0.94 (0.57-1.56)	15.1239	68.4338
Hüsing 2020	BCRmod recalibrated	Yes	≥40	EPIC-Germany	5	22098	2210		35	0.61 (0.42-0.89)	26.8137	121.329
Hüsing 2020	BCRmod recalibrated	Yes	≥40	EPIC-Germany	5	22098	2210		45	1.02 (0.64-1.62)	17.9369	81.1627
Hüsing 2020	BCRmod recalibrated	Yes	≥40	EPIC-Germany	5	22098	2210		55	0.64 (0.45-0.90)	31.8565	144.147
Hüsing 2020	BCRmod recalibrated	Yes	≥40	EPIC-Germany	5	22098	2210		65	0.90 (0.61-1.34)	24.8006	112.22
Hüsing 2020	BCRmod recalibrated	Yes	≥40	EPIC-Germany	5	22098	2210		75	0.81 (0.57-1.15)	30.8488	139.587
Hüsing 2020	BCRmod recalibrated	Yes	≥40	EPIC-Germany	5	22098	2210		85	0.72 (0.53-0.98)	40.1233	181.554
Hüsing 2020	BCRmod recalibrated	Yes	≥40	EPIC-Germany	5	22098	2210		95	0.81 (0.61-1.07)	48.7703	220.68
Hüsing 2020	BCRmod recalibrated	Yes	≥40	EPIC-Germany	5	22098	2210			0.80 (0.70-0.90)
Jee 2020	KRKR	Yes	<50	KCPS II Biobank	5	57439	5744		5	1.12 (0.58-2.14)	3	5.22284
Jee 2020	KRKR	Yes	<50	KCPS II Biobank	5	57439	5749		15	2.22 (1.15-4.26)	3	5.2183
Jee 2020	KRKR	Yes	<50	KCPS II Biobank	5	57439	5739		25	1.09 (0.88-1.35)	9	15.6822
Jee 2020	KRKR	Yes	<50	KCPS II Biobank	5	57439	5744		35	0.88 (0.77-1.00)	15	26.1142
Jee 2020	KRKR	Yes	<50	KCPS II Biobank	5	57439	5744		45	0.89 (0.80-0.98)	19	33.078
Jee 2020	KRKR	Yes	<50	KCPS II Biobank	5	57439	5748		55	1.04 (0.94-1.14)	20	34.7947
Jee 2020	KRKR	Yes	<50	KCPS II Biobank	5	57439	5740		65	0.71 (0.67-0.75)	35	60.9756
Jee 2020	KRKR	Yes	<50	KCPS II Biobank	5	57439	5743		75	0.75 (0.71-0.79)	39	67.9088
Jee 2020	KRKR	Yes	<50	KCPS II Biobank	5	57439	5750		85	0.90 (0.86-0.95)	38	66.087
Jee 2020	KRKR	Yes	<50	KCPS II Biobank	5	57439	5738		95	1.25 (1.21-1.30)	52	90.6239
Jee 2020	KRKR	Yes	<50	KCPS II Biobank	5	57439				0.96 (0.85-1.09)
Jee 2020	KREA	Yes	<50	KCPS II Biobank	5	57439	5744		5	3.51 (0.49-24.89)	1	1.74095
Jee 2020	KREA	Yes	<50	KCPS II Biobank	5	57439	5744		15	1.72 (1.05-2.80)	4	6.96379
Jee 2020	KREA	Yes	<50	KCPS II Biobank	5	57439	5751		25	1.27 (0.99-1.62)	8	13.9106
Jee 2020	KREA	Yes	<50	KCPS II Biobank	5	57439	5751		35	0.80 (0.71-0.90)	17	29.5601
Jee 2020	KREA	Yes	<50	KCPS II Biobank	5	57439	5733		45	0.91 (0.82-1.01)	19	33.1415
Jee 2020	KREA	Yes	<50	KCPS II Biobank	5	57439	5742		55	1.12 (1.01-1.24)	19	33.0895
Jee 2020	KREA	Yes	<50	KCPS II Biobank	5	57439	5743		65	0.67 (0.64-0.70)	38	66.1675
Jee 2020	KREA	Yes	<50	KCPS II Biobank	5	57439	5744		75	0.95 (0.89-1.01)	31	53.9694
Jee 2020	KREA	Yes	<50	KCPS II Biobank	5	57439	5744		85	1.03 (0.97-1.09)	33	57.4513
Jee 2020	KREA	Yes	<50	KCPS II Biobank	5	57439	5743		95	0.75 (0.73-0.77)	63	109.699
Jee 2020	KREA	Yes	<50	KCPS II Biobank	5	57439				0.89 (0.79-1.02)
Jee 2020	KRKR	Yes	≥50	KCPS II Biobank	5	18767	1879		5	0.60 (0.37-0.98)	4	21.2879
Jee 2020	KRKR	Yes	≥50	KCPS II Biobank	5	18767	1875		15	2.05 (0.77-5.45)	2	10.6667
Jee 2020	KRKR	Yes	≥50	KCPS II Biobank	5	18767	1876		25	0.68 (0.53-0.86)	8	42.6439
Jee 2020	KRKR	Yes	≥50	KCPS II Biobank	5	18767	1877		35	0.96 (0.72-1.27)	7	37.2936
Jee 2020	KRKR	Yes	≥50	KCPS II Biobank	5	18767	1877		45	0.87 (0.70-1.08)	9	47.9489
Jee 2020	KRKR	Yes	≥50	KCPS II Biobank	5	18767	1876		55	1.48 (1.07-2.05)	6	31.9829
Jee 2020	KRKR	Yes	≥50	KCPS II Biobank	5	18767	1879		65	0.59 (0.53-0.66)	17	90.4737
Jee 2020	KRKR	Yes	≥50	KCPS II Biobank	5	18767	1874		75	1.25 (1.01-1.55)	9	48.0256
Jee 2020	KRKR	Yes	≥50	KCPS II Biobank	5	18767	1877		85	0.76 (0.68-0.86)	17	90.5701
Jee 2020	KRKR	Yes	≥50	KCPS II Biobank	5	18767	1877		95	3.04 (2.38-3.88)	8	42.6212
Jee 2020	KRKR	Yes	≥50	KCPS II Biobank	5	18767				0.94 (0.76-1.16)
Jee 2020	KREA	Yes	≥50	KCPS II Biobank	5	18767	1877		5	0.75 (0.39-1.43)	3	15.983
Jee 2020	KREA	Yes	≥50	KCPS II Biobank	5	18767	1877		15	1.89 (0.71-5.04)	2	10.6553
Jee 2020	KREA	Yes	≥50	KCPS II Biobank	5	18767	1876		25	0.86 (0.62-1.19)	6	31.9829
Jee 2020	KREA	Yes	≥50	KCPS II Biobank	5	18767	1877		35	0.73 (0.59-0.91)	9	47.9489
Jee 2020	KREA	Yes	≥50	KCPS II Biobank	5	18767	1878		45	0.86 (0.69-1.07)	9	47.9233
Jee 2020	KREA	Yes	≥50	KCPS II Biobank	5	18767	1878		55	0.96 (0.78-1.20)	9	47.9233
Jee 2020	KREA	Yes	≥50	KCPS II Biobank	5	18767	1874		65	0.60 (0.53-0.68)	16	85.3789
Jee 2020	KREA	Yes	≥50	KCPS II Biobank	5	18767	1876		75	1.54 (1.16-2.03)	7	37.3134
Jee 2020	KREA	Yes	≥50	KCPS II Biobank	5	18767	1879		85	1.09 (0.93-1.29)	12	63.8638
Jee 2020	KREA	Yes	≥50	KCPS II Biobank	5	18767	1875		95	1.50 (1.30-1.72)	14	74.6667
Jee 2020	KREA	Yes	≥50	KCPS II Biobank	5	18767				1.02 (0.83-1.26)
Terry 2019	Tyrer-Cuzick v8.0b	No	20-70	ProF-SC	5	15732	4694	<0.85	15	0.51 (0.36-0.72)	32	68.1721
Terry 2019	Tyrer-Cuzick v8.0b	No	20-70	ProF-SC	5	15732	3525	≥0.85-1.7	41	0.93 (0.70-1.25)	45	127.66
Terry 2019	Tyrer-Cuzick v8.0b	No	20-70	ProF-SC	5	15732	2761	≥1.7-2.5	61	0.80 (0.63-1.01)	68	246.288
Terry 2019	Tyrer-Cuzick v8.0b	No	20-70	ProF-SC	5	15732	4752	≥2.5	85	1.16 (1.01-1.33)	197	414.562
Terry 2019	Tyrer-Cuzick v8.0b	No	20-70	ProF-SC	5	15732				1.00 (0.90-1.11)
Terry 2019	BCRAT v4	No	20-70	ProF-SC	5	15732	5617	<0.85	18	0.21 (0.17-0.26)	84	149.546
Terry 2019	BCRAT v4	No	20-70	ProF-SC	5	15732	3898	≥0.85-1.7	48	0.56 (0.45-0.69)	83	212.93
Terry 2019	BCRAT v4	No	20-70	ProF-SC	5	15732	2538	≥1.7-2.5	69	0.84 (0.65-1.08)	59	232.467
Terry 2019	BCRAT v4	No	20-70	ProF-SC	5	15732	3679	≥2.5	88	1.21 (1.01-1.45)	116	315.303
Terry 2019	BCRAT v4	No	20-70	ProF-SC	5	15732				0.74 (0.67-0.83)
Terry 2019	BRCAPRO v2.1-3	No	20-70	ProF-SC	5	15732	7426	<0.85	24	0.28 (0.23-0.34)	90	121.196
Terry 2019	BRCAPRO v2.1-3	No	20-70	ProF-SC	5	15732	4919	≥0.85-1.7	63	0.54 (0.45-0.66)	105	213.458
Terry 2019	BRCAPRO v2.1-3	No	20-70	ProF-SC	5	15732	2319	≥1.7-2.5	86	0.72 (0.56-0.92)	60	258.732
Terry 2019	BRCAPRO v2.1-3	No	20-70	ProF-SC	5	15732	1068	≥2.5	97	0.77 (0.62-0.95)	87	814.607
Terry 2019	BRCAPRO v2.1-3	No	20-70	ProF-SC	5	15732				0.56 (0.50-0.62)
Terry 2019	BOADICEA v3	No	20-70	ProF-SC	5	15732	3918	<0.85	12	0.59 (0.39-0.88)	23	58.7034
Terry 2019	BOADICEA v3	No	20-70	ProF-SC	5	15732	3400	≥0.85-1.7	36	0.76 (0.58-1.00)	54	158.824
Terry 2019	BOADICEA v3	No	20-70	ProF-SC	5	15732	3453	≥1.7-2.5	57	0.93 (0.74-1.18)	73	211.41
Terry 2019	BOADICEA v3	No	20-70	ProF-SC	5	15732	4961	≥2.5	84	1.18 (1.03-1.36)	192	387.019
Terry 2019	BOADICEA v3	No	20-70	ProF-SC	5	15732				1.02 (0.91-1.14)
Terry 2019	Tyrer-Cuzick v8.0b	No	20-70	ProF-SC	10	15732	3780	<1.7	12	0.65 (0.48-0.88)	41	108.466
Terry 2019	Tyrer-Cuzick v8.0b	No	20-70	ProF-SC	10	15732	3598	≥1.7-<3.4	35	0.90 (0.73-1.11)	86	239.022
Terry 2019	Tyrer-Cuzick v8.0b	No	20-70	ProF-SC	10	15732	3088	≥3.4-<5	57	0.89 (0.74-1.06)	123	398.316
Terry 2019	Tyrer-Cuzick v8.0b	No	20-70	ProF-SC	10	15732	5266	≥5	83	1.16 (1.05-1.28)	369	700.722
Terry 2019	Tyrer-Cuzick v8.0b	No	20-70	ProF-SC	10					1.03 (0.96-1.12)
Terry 2019	BCRAT v4	No	20-70	ProF-SC	10	15732	4723	<1.7	15	0.28 (0.23-0.33)	106	224.434
Terry 2019	BCRAT v4	No	20-70	ProF-SC	10	15732	4194	≥1.7-<3.4	43	0.58 (0.49-0.67)	155	369.576
Terry 2019	BCRAT v4	No	20-70	ProF-SC	10	15732	2765	≥3.4-<5	65	0.82 (0.68-0.98)	118	426.763
Terry 2019	BCRAT v4	No	20-70	ProF-SC	10	15732	4050	≥5	87	1.14 (1.00-1.29)	240	592.593
Terry 2019	BCRAT v4	No	20-70	ProF-SC	10	15732				0.79 (0.73-0.85)
Terry 2019	BRCAPRO v2.1-3	No	20-70	ProF-SC	10	15732	6405	<1.7	20	0.34 (0.29-0.40)	127	198.283
Terry 2019	BRCAPRO v2.1-3	No	20-70	ProF-SC	10	15732	5418	≥1.7-<3.4	58	0.54 (0.47-0.62)	208	383.906
Terry 2019	BRCAPRO v2.1-3	No	20-70	ProF-SC	10	15732	2733	≥3.4-<5	84	0.64 (0.55-0.76)	141	515.917
Terry 2019	BRCAPRO v2.1-3	No	20-70	ProF-SC	10	15732	1176	≥5	96	0.85 (0.72-1.00)	143	1215.99
Terry 2019	BRCAPRO v2.1-3	No	20-70	ProF-SC	10	15732				0.59 (0.55-0.64)
Terry 2019	BOADICEA v3	No	20-70	ProF-SC	10	15732	3005	<1.7	10	0.88 (0.59-1.31)	24	79.8669
Terry 2019	BOADICEA v3	No	20-70	ProF-SC	10	15732	3468	≥1.7-<3.4	30	0.86 (0.70-1.07)	88	253.749
Terry 2019	BOADICEA v3	No	20-70	ProF-SC	10	15732	3912	≥3.4-<5	54	0.91 (0.78-1.06)	154	393.661
Terry 2019	BOADICEA v3	No	20-70	ProF-SC	10	15732	5347	≥5	83	1.18 (1.06-1.31)	353	660.183
Terry 2019	BOADICEA v3	No	20-70	ProF-SC	10	15732				1.05 (0.97-1.14)
Brentnall 2018	Tyrer-Cuzick v7.02	No	All ages	KPW-BCSC	10	132139	47975	<2	10	0.82 (0.76-0.89)	648	135.07
Brentnall 2018	Tyrer-Cuzick v7.02	No	All ages	KPW-BCSC	10	132139	42700	2-3	40	0.99 (0.92-1.06)	792	185.48
Brentnall 2018	Tyrer-Cuzick v7.02	No	All ages	KPW-BCSC	10	132139	29523	3-5	75	0.98 (0.91-1.05)	779	263.862
Brentnall 2018	Tyrer-Cuzick v7.02	No	All ages	KPW-BCSC	10	132139	9387	5-<8	94	1.15 (1.03-1.28)	333	354.746
Brentnall 2018	Tyrer-Cuzick v7.02	No	All ages	KPW-BCSC	10	132139	2554	≥8	99	1.27 (1.08-1.49)	147	575.568
Brentnall 2018	Tyrer-Cuzick v7.02	No	All ages	KPW-BCSC	10	132139				0.98 (0.94-1.02)
Brentnall 2018	Tyrer-Cuzick v7.02 + breast density	No	All ages	KPW-BCSC	10	132139	53436	<2	14	0.85 (0.79-0.93)	641	119.957
Brentnall 2018	Tyrer-Cuzick v7.02 + breast density	No	All ages	KPW-BCSC	10	132139	33269	2-3	42	0.96 (0.89-1.04)	627	188.464
Brentnall 2018	Tyrer-Cuzick v7.02 + breast density	No	All ages	KPW-BCSC	10	132139	29477	3-5	70	1.01 (0.93-1.08)	779	264.274
Brentnall 2018	Tyrer-Cuzick v7.02 + breast density	No	All ages	KPW-BCSC	10	132139	11312	5-<8	90	1.25 (1.12-1.39)	379	335.042
Brentnall 2018	Tyrer-Cuzick v7.02 + breast density	No	All ages	KPW-BCSC	10	132139	4645	≥8	97	1.28 (1.14-1.45)	273	587.729
Brentnall 2018	Tyrer-Cuzick v7.02 + breast density	No	All ages	KPW-BCSC	10	132139				1.02 (0.98-1.06)
Li 2018	WHI ER+	No	50-79	WHI	5	82319	8232		5	1.20 (0.96-1.49)	79.4388	96.5
Li 2018	WHI ER+	No	50-79	WHI	5	82319	8232		15	1.46 (1.17-1.82)	79.4388	96.5
Li 2018	WHI ER+	No	50-79	WHI	5	82319	8232		25	1.12 (0.93-1.34)	114.425	139
Li 2018	WHI ER+	No	50-79	WHI	5	82319	8232		35	0.98 (0.83-1.15)	142.99	173.7
Li 2018	WHI ER+	No	50-79	WHI	5	82319	8232		45	1.16 (0.98-1.38)	129.242	157
Li 2018	WHI ER+	No	50-79	WHI	5	82319	8232		55	1.06 (0.91-1.25)	151.469	184
Li 2018	WHI ER+	No	50-79	WHI	5	82319	8232		65	1.09 (0.94-1.28)	158.878	193
Li 2018	WHI ER+	No	50-79	WHI	5	82319	8232		75	0.93 (0.81-1.07)	200.202	243.2
Li 2018	WHI ER+	No	50-79	WHI	5	82319	8232		85	1.13 (0.98-1.31)	182.174	221.3
Li 2018	WHI ER+	No	50-79	WHI	5	82319	8232		95	1.09 (0.96-1.24)	228.767	277.9
Li 2018	WHI ER+	No	50-79	WHI	5	82319				1.09 (1.04-1.15)
Li 2018	WHI ER-	No	50-79	WHI	5	82319	8232		5	0.91 (0.56-1.46)	17.1226	20.8
Li 2018	WHI ER-	No	50-79	WHI	5	82319	8232		15	0.54 (0.39-0.75)	35.233	42.8
Li 2018	WHI ER-	No	50-79	WHI	5	82319	8232		25	1.14 (0.72-1.81)	17.9458	21.8
Li 2018	WHI ER-	No	50-79	WHI	5	82319	8232		35	0.97 (0.65-1.45)	23.6258	28.7
Li 2018	WHI ER-	No	50-79	WHI	5	82319	8232		45	0.72 (0.52-1.01)	34.2451	41.6
Li 2018	WHI ER-	No	50-79	WHI	5	82319	8232		55	0.85 (0.60-1.20)	31.8578	38.7
Li 2018	WHI ER-	No	50-79	WHI	5	82319	8232		65	1.04 (0.71-1.50)	27.7418	33.7
Li 2018	WHI ER-	No	50-79	WHI	5	82319	8232		75	1.13 (0.78-1.64)	27.7418	33.7
Li 2018	WHI ER-	No	50-79	WHI	5	82319	8232		85	1.46 (0.98-2.19)	23.6258	28.7
Li 2018	WHI ER-	No	50-79	WHI	5	82319	8232		95	1.03 (0.75-1.41)	38.3611	46.6
Li 2018	WHI ER-	No	50-79	WHI	5	82319				0.95 (0.85-1.07)
Min 2014	AABCS	No	All ages	WHC CGH	5	40229	8218	<0.352	10	0.74 (0.51-1.09)	26	31.6379
Min 2014	AABCS	No	All ages	WHC CGH	5	40229	7687	≥0.352-< 0.468	30	0.87 (0.63-1.20)	37	48.1332
Min 2014	AABCS	No	All ages	WHC CGH	5	40229	8221	≥0.468-< 0.560	50	2.07 (1.34-3.21)	20	24.3279
Min 2014	AABCS	No	All ages	WHC CGH	5	40229	8274	≥0.560-< 0.659	70	1.55 (1.10-2.17)	33	39.884
Min 2014	AABCS	No	All ages	WHC CGH	5	40229	7829	≥0.659	90	1.43 (1.07-1.91)	45	57.4786
Min 2014	AABCS	No	All ages	WHC CGH	5	40229				1.29 (1.11-1.51)
Min 2014	BCRAT v2	No	All ages	WHC CGH	5	40229	7804	<0.669	10	1.39 (0.92-2.09)	23	29.4721
Min 2014	BCRAT v2	No	All ages	WHC CGH	5	40229	8635	≥0.669 -<0.886	30	1.83 (1.33-2.53)	37	42.8489
Min 2014	BCRAT v2	No	All ages	WHC CGH	5	40229	7348	≥0.886 -<1.062	50	2.84 (1.92-4.20)	25	34.0229
Min 2014	BCRAT v2	No	All ages	WHC CGH	5	40229	7833	≥1.062 -<1.294	70	3.48 (2.37-5.12)	26	33.1929
Min 2014	BCRAT v2	No	All ages	WHC CGH	5	40229	8609	≥1.294	90	2.69 (2.04-3.54)	50	58.0788
Min 2014	BCRAT v2	No	All ages	WHC CGH	5	40229				2.46 (2.10-2.87)
Min 2014	Updated Korean model	Yes	All ages	WHC CGH	5	40229	8096	<0.127	10	0.25 (0.17-0.36)	27	33.3498
Min 2014	Updated Korean model	Yes	All ages	WHC CGH	5	40229	8010	≥0.127-< 0.194	30	0.49 (0.33-0.72)	26	32.4594
Min 2014	Updated Korean model	Yes	All ages	WHC CGH	5	40229	8016	≥0.194-< 0.297	50	0.70 (0.48-1.01)	28	34.9301
Min 2014	Updated Korean model	Yes	All ages	WHC CGH	5	40229	8061	≥0.297-< 0.487	70	0.88 (0.63-1.22)	35	43.4189
Min 2014	Updated Korean model	Yes	All ages	WHC CGH	5	40229	8046	≥0.487	90	1.51 (1.13-2.02)	45	55.9284
Min 2014	Updated Korean model	Yes	All ages	WHC CGH	5	40229				0.85 (0.73-1.00)
Min 2014	Original Korean model	Yes	All ages	WHC CGH	5	40229	8048	<0.082	10	0.13 (0.09-0.18)	35	43.4891
Min 2014	Original Korean model	Yes	All ages	WHC CGH	5	40229	7954	≥0.082-< 0.123	30	0.31 (0.21-0.46)	26	32.688
Min 2014	Original Korean model	Yes	All ages	WHC CGH	5	40229	8094	≥0.123-< 0.183	50	0.34 (0.25-0.47)	36	44.4774
Min 2014	Original Korean model	Yes	All ages	WHC CGH	5	40229	8083	≥0.183-< 0.291	70	0.65 (0.45-0.95)	28	34.6406
Min 2014	Original Korean model	Yes	All ages	WHC CGH	5	40229	8050	≥0.291	90	1.04 (0.75-1.45)	36	44.7205
Min 2014	Original Korean model	Yes	All ages	WHC CGH	5	40229				0.50 (0.43-0.59)
Powell 2014	BCRAT v2 or 3	Yes	≥40	MWS	5	12843	1284		5	0.55 (0.28-1.10)	8	62.3053
Powell 2014	BCRAT v2 or 3	Yes	≥40	MWS	5	12843	1284		15	1.55 (0.64-3.71)	5	38.9408
Powell 2014	BCRAT v2 or 3	Yes	≥40	MWS	5	12843	1284		25	0.64 (0.39-1.05)	16	124.611
Powell 2014	BCRAT v2 or 3	Yes	≥40	MWS	5	12843	1284		35	0.72 (0.45-1.16)	17	132.399
Powell 2014	BCRAT v2 or 3	Yes	≥40	MWS	5	12843	1284		45	1.18 (0.67-2.09)	12	93.4579
Powell 2014	BCRAT v2 or 3	Yes	≥40	MWS	5	12843	1284		55	0.52 (0.36-0.73)	31	241.433
Powell 2014	BCRAT v2 or 3	Yes	≥40	MWS	5	12843	1284		65	0.73 (0.49-1.08)	25	194.704
Powell 2014	BCRAT v2 or 3	Yes	≥40	MWS	5	12843	1284		75	0.85 (0.57-1.27)	24	186.916
Powell 2014	BCRAT v2 or 3	Yes	≥40	MWS	5	12843	1284		85	1.01 (0.68-1.51)	24	186.916
Powell 2014	BCRAT v2 or 3	Yes	≥40	MWS	5	12843	1284		95	0.91 (0.67-1.24)	41	319.315
Powell 2014	BCRAT v2 or 3	Yes	≥40	MWS	5	12843				0.81 (0.71-0.93)
Powell 2014	BRCAPRO	Yes	≥40	MWS	5	12843	1284		5	0.51 (0.25-1.02)	8	62.3053
Powell 2014	BRCAPRO	Yes	≥40	MWS	5	12843	1284		15	0.53 (0.31-0.92)	13	101.246
Powell 2014	BRCAPRO	Yes	≥40	MWS	5	12843	1284		25	0.88 (0.49-1.59)	11	85.6698
Powell 2014	BRCAPRO	Yes	≥40	MWS	5	12843	1284		35	0.67 (0.42-1.06)	18	140.187
Powell 2014	BRCAPRO	Yes	≥40	MWS	5	12843	1284		45	0.58 (0.38-0.89)	22	171.34
Powell 2014	BRCAPRO	Yes	≥40	MWS	5	12843	1284		55	0.92 (0.54-1.55)	14	109.034
Powell 2014	BRCAPRO	Yes	≥40	MWS	5	12843	1284		65	0.61 (0.40-0.94)	21	163.551
Powell 2014	BRCAPRO	Yes	≥40	MWS	5	12843	1284		75	0.48 (0.33-0.69)	27	210.28
Powell 2014	BRCAPRO	Yes	≥40	MWS	5	12843	1284		85	0.40 (0.28-0.57)	32	249.221
Powell 2014	BRCAPRO	Yes	≥40	MWS	5	12843	1284		95	0.64 (0.46-0.88)	37	288.162
Powell 2014	BRCAPRO	Yes	≥40	MWS	5	12843				0.59 (0.52-0.68)
Arrospide 2013	Chen v1	Yes	50-69	Sabadell-Cerdanyola BCSP	5	12435	2423		10	0.86 (0.51-1.45)	14	57.7796
Arrospide 2013	Chen v1	Yes	50-69	Sabadell-Cerdanyola BCSP	5	12435	2519		30	1.55 (0.86-2.79)	11	43.6681
Arrospide 2013	Chen v1	Yes	50-69	Sabadell-Cerdanyola BCSP	5	12435	2495		50	1.00 (0.65-1.53)	21	84.1683
Arrospide 2013	Chen v1	Yes	50-69	Sabadell-Cerdanyola BCSP	5	12435	2511		70	1.13 (0.75-1.70)	23	91.597
Arrospide 2013	Chen v1	Yes	50-69	Sabadell-Cerdanyola BCSP	5	12435	2487		90	1.39 (0.96-2.02)	28	112.585
Arrospide 2013	Chen v1	Yes	50-69	Sabadell-Cerdanyola BCSP	5	12435				NR
Arrospide 2013	BCRAT v1	Yes	50-69	Sabadell-Cerdanyola BCSP	5	13446	2671		10	1.06 (0.65-1.73)	16	59.9027
Arrospide 2013	BCRAT v1	Yes	50-69	Sabadell-Cerdanyola BCSP	5	13446	2705		30	0.95 (0.63-1.45)	22	81.3309
Arrospide 2013	BCRAT v1	Yes	50-69	Sabadell-Cerdanyola BCSP	5	13446	2612		50	1.38 (0.84-2.24)	16	61.2557
Arrospide 2013	BCRAT v1	Yes	50-69	Sabadell-Cerdanyola BCSP	5	13446	2742		70	1.50 (0.95-2.38)	18	65.6455
Arrospide 2013	BCRAT v1	Yes	50-69	Sabadell-Cerdanyola BCSP	5	13446	2716		90	1.06 (0.76-1.47)	35	128.866
Arrospide 2013	BCRAT v1	Yes	50-69	Sabadell-Cerdanyola BCSP	5	13446				NR
Chay 2012	AABCS	No	50-64	SBCSP	5	28104	5621	1–20	10	1.57 (0.96-2.57)	16	28.4647
Chay 2012	AABCS	No	50-64	SBCSP	5	28104	5621	21–40	30	1.70 (1.08-2.67)	19	33.8018
Chay 2012	AABCS	No	50-64	SBCSP	5	28104	5621	41–60	50	1.30 (0.90-1.87)	29	51.5922
Chay 2012	AABCS	No	50-64	SBCSP	5	28104	5621	61–80	70	1.56 (1.08-2.24)	29	51.5922
Chay 2012	AABCS	No	50-64	SBCSP	5	28104	5621	81–100	90	1.29 (0.98-1.69)	51	90.7312
Chay 2012	AABCS	No	50-64	SBCSP	5	28104				1.43 (1.21-1.68)
Chay 2012	BCRAT v2	No	50-64	SBCSP	5	28104	5621	1–20	10	2.49 (1.61-3.86)	20	35.5809
Chay 2012	BCRAT v2	No	50-64	SBCSP	5	28104	5621	21–40	30	2.25 (1.54-3.27)	27	48.0342
Chay 2012	BCRAT v2	No	50-64	SBCSP	5	28104	5621	41–60	50	2.39 (1.66-3.44)	29	51.5922
Chay 2012	BCRAT v2	No	50-64	SBCSP	5	28104	5621	61–80	70	3.41 (2.27-5.13)	23	40.918
Chay 2012	BCRAT v2	No	50-64	SBCSP	5	28104	5621	81–100	90	2.31 (1.72-3.09)	45	80.0569
Chay 2012	BCRAT v2	No	50-64	SBCSP	5	28104				2.51 (2.14-2.96)
Chay 2012	AABCS	No	50-64	SBCSP	10	28104	5621	1–20	10	1.01 (0.76-1.33)	49	87.1731
Chay 2012	AABCS	No	50-64	SBCSP	10	28104	5621	21–40	30	1.17 (0.90-1.53)	55	97.8474
Chay 2012	AABCS	No	50-64	SBCSP	10	28104	5621	41–60	50	0.91 (0.73-1.12)	82	145.882
Chay 2012	AABCS	No	50-64	SBCSP	10	28104	5621	61–80	70	1.03 (0.83-1.27)	86	152.998
Chay 2012	AABCS	No	50-64	SBCSP	10	28104	5621	81–100	90	0.94 (0.79-1.11)	137	243.729
Chay 2012	AABCS	No	50-64	SBCSP	10	28104				0.99 (0.90-1.09)
Chay 2012	BCRAT v2	No	50-64	SBCSP	10	28104	5621	1–20	10	1.73 (1.35-2.22)	62	110.301
Chay 2012	BCRAT v2	No	50-64	SBCSP	10	28104	5621	21–40	30	1.83 (1.45-2.32)	70	124.533
Chay 2012	BCRAT v2	No	50-64	SBCSP	10	28104	5621	41–60	50	2.41 (1.87-3.11)	60	106.743
Chay 2012	BCRAT v2	No	50-64	SBCSP	10	28104	5621	61–80	70	1.84 (1.50-2.27)	89	158.335
Chay 2012	BCRAT v2	No	50-64	SBCSP	10	28104	5621	81–100	90	1.67 (1.41-1.99)	128	227.717
Chay 2012	BCRAT v2	No	50-64	SBCSP	10	28104				1.85 (1.68-2.04)
